# Supplementary material for: Identification of readily available pseudo-natural products
Source: Royal Society of Chemistry journal article supplement (doi:10.1039/d4md00310a), 2024-01-01
Supplement: d4md00310a4.pdf [file d4md00310a4.pdf]

Supporting\_Information.docx:

Supporting information to the manuscript.

Contains figure S1 and the description of the Cell painting assay.

ds\_enamine\_pnp\_cpa\_actives.xlsx:

Cell painting data for 187 measurements that were found active.

44 measurements were active at 10µM, 143 were active at 30µM.

Columns:

Enamine\_Id: Compound identifier (Enamine)

Compound\_Id: Compound identifier (COMAS)

Well\_Id: Unique identifier of a measurement in the dataset

Conc\_uM: measurement concentration in µM

Induction: Cell painting induction value

Rel\_Cell\_Count: Cell count in percent, relative to DMSO controls

Toxic: Whether the compound is toxic (Rel\_Cell\_Count < 50) or not at the tested concentration

Cluster\_High: The biological cluster with the highest similarity to this measurement,  
using subprofile analysis

Cluster\_Sim: The biosimilarity value to this cluster, in percent

Cluster\_\*: Individual biosimilarity to the given biological cluster,  
using subprofile analysis, in percent

Smiles: SMILES encoding of the structure

SPS: Spatial score

nSPS: normalized spatial score

NumHA: number of heavy (non-hydrogen) atoms

PNP\_Status

npfc\_ctypes: fragment connection types found in the compound

npfc\_num\_frags: number of NP fragments found in the compound

Median\_\*: The 579 individual Cell painting feature values (Z-scores)

ds\_enamine\_pnp\_cpa\_actives\_struct.xlsx:

Cluster assignments for 187 measurements that were found active.

44 measurements were active at 10µM, 143 were active at 30µM.

Columns:

Enamine\_Id: Compound identifier (Enamine)

Conc\_uM: measurement concentration in µM

Induction: Cell painting induction value

Rel\_Cell\_Count: Cell count in percent, relative to DMSO controls

Cluster: The assigned biological cluster, using subprofile analysis

A biosimilarity of >= 80% is required, otherwise the cluster is "not assigned"

Cluster\_\*: Individual biosimilarity to the given biological cluster,  
using subprofile analysis, in percent

enamine\_pnp\_fcc.xlsx:

The hundred most common fragment combinations in the Enamine PNP set.

Columns:

fcc: Fragment combination classification. Has 3 parts: <Frag1\_Id>[ctype]<Frag2\_Id>

count: The number of occurrences in the data set

perc: Percentage of occurrence

frag1\_smiles: Smiles of the first fragment

ctype: connection type (see manuscript)

frag2\_smiles: Smiles of the second fragment
