# Supplementary material for: Identification of readily available pseudo-natural products
Source: RSC Med Chem. 2024 Jul 4;15(8):2709–17. doi: 10.1039/d4md00310a (PMC11324060; doi:10.1039/d4md00310a)
Supplement: MD-015-D4MD00310A-s001 [file MD-015-D4MD00310A-s001.xlsx]

## Sheet: ds_enamine_pnp_cpa_actives
Enamine_Id	Compound_Id	Well_Id	Conc_uM	Induction	Rel_Cell_Count	Toxic	ActClass	Cluster_High	Cluster_Sim	Cluster_AKT_PI3K_MTOR	Cluster_Aurora	Cluster_BET	Cluster_DNA_Synth	Cluster_HDAC	Cluster_HSP90	Cluster_LCH	Cluster_MitoStress	Cluster_Na_K-ATPase	Cluster_Protein_Synth	Cluster_Tubulin	Cluster_Uncoupler	Smiles	SPS	nSPS	NumHA	PNP_Status	npfc_ctypes	npfc_num_frags	Median_Cells_AreaShape_Area	Median_Cells_AreaShape_MaximumRadius	Median_Cells_AreaShape_MeanRadius	Median_Cells_AreaShape_MinFeretDiameter	Median_Cells_AreaShape_MinorAxisLength	Median_Cells_AreaShape_Perimeter	Median_Cells_Correlation_Correlation_ER_Ph_golgi	Median_Cells_Correlation_Correlation_ER_Syto	Median_Cells_Correlation_Correlation_Hoechst_ER	Median_Cells_Correlation_Correlation_Hoechst_Mito	Median_Cells_Correlation_Correlation_Hoechst_Ph_golgi	Median_Cells_Correlation_Correlation_Hoechst_Syto	Median_Cells_Correlation_Correlation_Mito_ER	Median_Cells_Correlation_Correlation_Mito_Ph_golgi	Median_Cells_Correlation_Correlation_Mito_Syto	Median_Cells_Correlation_Correlation_Syto_Ph_golgi	Median_Cells_Correlation_K_ER_Syto	Median_Cells_Correlation_K_Hoechst_Syto	Median_Cells_Correlation_K_Mito_Hoechst	Median_Cells_Correlation_K_Ph_golgi_Syto	Median_Cells_Correlation_K_Syto_ER
Z1934778220	529366	529366:01:02_10.00	10	5	97	False	Active	HDAC	74.2	0	0	67.3	0	74.2	36.4	64.9	1	34.8	47	69.7	43.1	CC1(C)CN(C(=O)c2csc(-c3cc(Br)cs3)n2)CC1O	440	20.95	21	PNP	cm, cm	3	-1.169	-3.136	-1.853	-1.62	-1.884	-2.159	0.208	-0.72	-0.472	0.225	-0.166	-0.325	0.517	-0.06	0.295	-0.231	-0.461	-0.329	-1.019	-0.227	0.492
Z1529189039	528753	528753:01:02_10.00	10	5.2	107	False	Active	LCH	26.7	0	0	24.5	0	21	0	26.7	5.2	18.4	10.5	1.5	4.5	OC1CC(c2ccc(F)c(F)c2)N(Cc2ccon2)C1	467	23.35	20	PNP	cm	2	-0.593	-1.816	-0.787	-0.983	-0.74	-0.825	-4.56	-3.845	-3.526	-0.748	-0.105	-0.224	-2.783	-0.99	-0.689	-0.752	-1.896	-3.287	0.894	-1.155	1.912
Z1983676530	529471	529471:01:02_10.00	10	5.4	97	False	Active	HDAC	63.8	0	0	46.6	0	63.8	24.3	25.6	0	45.5	24.3	38.6	36.1	Cc1cc(C(F)(F)F)nc(N2CCCC2C2CCCCC2O)n1	669	29.09	23	PNP	cm, cm, cm	3	-0.897	-0.789	0.269	0.47	0.458	-1.579	3.104	0.557	-1.359	-1.552	0.42	-0.125	2.115	3.299	-0.23	1.414	0.648	-1.054	0.891	0.546	-0.423
Z4324040989	529374	529374:01:02_10.00	10	5.4	98	False	Active	HDAC	57.2	0	20.3	48.7	0	57.2	0	42.6	0	44.4	35.3	40.7	8.7	COc1cccc(C2CC(NC(=O)C3CC(F)(CO)C3)C2)c1	737	33.5	22	PNP	cm	2	0.147	0.674	0.252	0.825	0.142	-0.471	-2.014	-0.734	-0.957	0.237	0.767	-0.21	-0.382	0.952	-0.674	0.163	0.451	-2.542	1.634	0.674	-0.806
Z1192266318	529205	529205:01:02_10.00	10	5.7	99	False	Active	HDAC	46.4	0	16.1	38.5	0	46.4	0	28.1	0	39	20.4	24	0	Cc1ncn(Cc2nnnn2-c2ccccc2)c1C	206	10.84	19	PNP	cm	2	-1.162	0.73	-0.208	1.281	2.118	-1.42	-2.148	0.246	-1.484	-1.011	-0.432	-0.168	-1.069	0.394	0.271	0.429	-0.406	-3.489	1.918	-0.997	0.274
Z2440388168	528782	528782:01:02_10.00	10	6	97	False	Active	MitoStress	57.9	0	0.8	30.3	9.7	23.1	22.1	54.5	57.9	0	5.4	44.7	11.1	NCC1CCCC1NC(=O)c1[nH]nc2ccc(Br)cc12	446	22.3	20	PNP	cm	2	0.021	-0.789	0.106	-0.999	0.053	-1.23	-1.929	-0.099	-1.885	-0.203	-0.217	0.038	0.175	-1.589	-0.32	-0.871	-1.014	1.248	-1.862	-0.86	1.251
Z319100322	528673	528673:01:02_10.00	10	6	103	False	Active	LCH	64	0	0	55.5	0	53.1	15.5	64	40.8	31.2	27.4	45.1	20.8	Cc1sc2[nH]c(CN3CCC(C)CC3)nc(=NCCCNS(C)(=O)=O)c2c1C	468	16.71	28	PNP	cm, cm, fe	3	-1.297	-4.067	-0.831	-2.541	-2.821	-0.753	0.427	-0.947	-2.11	-6.758	-0.847	-0.641	0.505	-5.285	-4.041	-2.041	-0.626	-1.974	-0.112	-0.727	0.706
Z1546890795	529065	529065:01:02_10.00	10	6.4	89	False	Active	MitoStress	47.6	0	6.1	21.7	0	20.5	25.4	28.6	47.6	16.1	35.7	36.2	2.7	Cc1ccc(C2CN(c3ncc(C)c(C)n3)CCO2)o1	387	19.35	20	PNP	cm, cm, cm	3	0.338	0.096	-0.385	0.942	0.31	-0.403	2.469	1.582	0.654	-0.713	1.274	-0.521	0.858	-1.081	0.365	1.926	-0.11	-0.23	-0.01	-0.088	-0.19
Z147142110	529060	529060:01:02_10.00	10	6.4	102	False	Active	LCH	69.7	0	0	48.4	0	43.9	6.4	69.7	4.3	7.1	5.5	36.6	23.9	CCC1c2ccsc2CCN1C(=O)c1ccnc(Cl)c1	358	17.9	20	PNP	cm	2	-1.671	-1.724	-2.209	-2.273	-1.112	-1.275	-2.303	-1.23	-1.385	-1.419	-1.058	0.167	-1.819	-1.197	-0.043	-0.876	-2.58	-1.438	-0.029	-3.48	3.097
Z1566227021	529388	529388:01:02_10.00	10	6.9	99	False	Active	Protein_Synth	60.9	0	0	48.3	0	52.9	39.8	49.6	0	13.2	60.9	51.6	43.8	C=CC(=O)Nc1cc(NC(=O)c2cnn(CC(C)C)c2C2CC2)ccc1F	364	13.48	27	PNP	cm	2	-2.939	-2.717	-2.978	-0.276	-1.855	-1.961	-2.617	-0.891	-2.657	-0.404	-0.219	-0.659	-0.529	-0.543	-1.622	-2.109	0.145	-0.197	0.505	0.338	-0.277
Z1336472328	529219	529219:01:02_10.00	10	7.1	101	False	Active	LCH	67.7	23.9	0	38.6	0	37.3	27.7	67.7	35.2	0	0	39.4	31.1	Cc1cc(C(=O)Nc2sc(C)cc2C(N)=O)c2cnn(C)c2n1	251	10.91	23	PNP	cm, cm, fe	3	-1.041	-0.865	-1.511	-0.504	-2.476	-0.366	-1.222	-0.94	-3.114	-1.363	-0.42	-0.393	-1.254	-1.419	-0.352	-1.033	-2.647	-1.366	-1.234	-2.517	2.7
Z1626149215	529081	529081:01:02_10.00	10	7.1	98	False	Active	HDAC	65.9	0	4.3	59.1	0	65.9	0	41.9	0	46.5	39.5	43.9	35.8	CCOC(=O)c1cnn(C2CCCN(Cc3c(C)n[nH]c3C)C2)c1	449	18.71	24	PNP	cm, cm	3	-0.453	-2.045	-1.012	-1.391	-0.735	-0.361	-1.485	-0.524	-2.347	-0.915	-0.488	0.07	0.86	-1.634	-0.475	-0.381	-0.309	-0.399	1.547	0.474	-0.05
Z2711802286	528908	528908:01:02_10.00	10	7.3	102	False	Active	LCH	63.6	0	0	50.3	0	47.5	29.8	63.6	53.3	15.8	26.4	47.6	22.5	CCOC(C(=O)N=c1[nH]c(-c2ccc3c(c2)CCC(=O)N3)c(C)s1)C(C)C	395	14.63	27	PNP	cm	2	-2.08	-4.067	-2.36	-2.907	-2.532	-0.801	-1.53	0.536	-1.17	-5.144	-0.612	-0.437	1.301	-2.742	-2.109	-0.298	-1.788	-1.387	-1.023	-1.336	1.457
Z2073445831	509218	509218:02:02_10.00	10	7.4	100	False	Active	DNA_Synth	67.5	53.5	0	0	67.5	0	10	3.9	27.4	0	2.8	0	10.8	NC(=O)c1[nH]nc2ccc(NC(=O)c3sccc3Cl)cc12	225	10.71	21	PNP	cm	2	-0.203	0.858	0.6	1.288	1.385	0.129	2.294	0.385	-0.445	-1.106	0.94	-1.064	-1.4	0.494	-1.461	-0.474	0.511	0.807	-0.144	-0.411	-0.128
Z2271720673	528997	528997:01:02_10.00	10	7.6	97	False	Active	Uncoupler	26.8	8.8	0	2.2	0	15.6	0	0	0	24.7	7.4	0	26.8	Cc1cnn(C2CCCN(c3nccc(C#N)n3)C2)c1	376	18.8	20	PNP	cm, cm, cm	3	-0.051	-1	-0.453	-0.029	-1.297	0.941	0.816	0.026	-0.144	0.027	0.401	-0.193	-1.238	1.987	-0.136	0.874	1.092	0.374	2.11	1.099	-1.186
Z1795984189	528652	528652:01:02_10.00	10	7.8	84	False	Active	Tubulin	56.6	0	0	34.2	9.1	35.1	13.9	38.5	11.7	20	44.5	56.6	37.4	CCOC(=O)C1CCCN(c2cncc(-n3ccnc3C)n2)C1	414	18	23	PNP	cm, cm, cm	3	-0.872	-2.031	-1.991	-0.911	-1.056	-0.971	2.727	1.773	1.758	1.345	1.29	-0.316	1.67	2.493	1.488	2.409	0.972	1.683	-1.219	0.375	-0.721
Z1280184773	528932	528932:01:02_10.00	10	8.5	88	False	Active	DNA_Synth	85.2	36.3	32.5	0	85.2	0	7.9	0	21.6	0	0	0	0	CC(C)c1cc(=NC(=O)C2Cc3ccccc3O2)[nH][nH]1	337	16.85	20	PNP	cm	2	4.869	5.183	4.589	5.263	4.694	4.71	-1.377	-0.689	-0.765	2.926	1.317	1.631	-1.103	2.081	1.164	1.512	0.023	1.457	-0.93	0.854	-0.199
Z56884254	528869	528869:01:02_10.00	10	8.8	95	False	Active	HSP90	56.6	12.1	0	13.6	0	20.9	56.6	37.6	56.2	0	24	22.9	12.4	COC(=O)c1c(NC(=O)C2CCCO2)sc2c1CCC(C)C2	526	23.91	22	PNP	cm	2	-0.246	0.366	-0.434	1.191	0.484	0.841	-1.184	-0.173	-1.328	-1.522	-1.042	-0.25	-0.722	-2.693	-0.185	-0.682	0.323	-0.466	-1.478	0.136	-0.211
Z2252066711	529030	529030:01:02_10.00	10	9	93	False	Active	DNA_Synth	89.3	41.7	20	0	89.3	0	5.8	0	41.6	0	0	0	0	CCC(=O)C1(C(=O)N2CCN(c3ccc(O)cc3)CC2)CC1	437	19.86	22	PNP	cm	2	2.328	4.065	3.477	3.085	2.747	3.4	-1.331	0.304	0.017	0.303	0.379	-0.008	-1.907	1.409	0.544	0.327	-0.11	1.52	-1.703	-0.176	0.065
Z1232659049	529209	529209:01:02_10.00	10	9	95	False	Active	LCH	77.3	0	0	69.8	0	74	34.3	77.3	46.4	35.8	57.8	72.9	47.6	CCn1nc(C)c(CN=c2cc(C#N)c3ccccc3[nH]2)c1C	246	10.7	23	PNP	cm	2	-1.37	-0.904	-0.816	-1.783	-1.353	-2.306	0.63	-0.15	-1.949	-1.943	-0.344	-0.631	0.185	0.565	0.351	-0.182	-1.113	-1.118	-0.615	0.136	1.141
Z1348251657	529218	529218:01:02_10.00	10	10.7	97	False	Active	AKT_PI3K_MTOR	63	63	0	0	52.4	0	0	0.4	38	0	0	0	8.1	Cc1cc(CSc2nnc(CCC(N)=O)n2C)c2ccccc2n1	266	11.08	24	PNP	cm	2	-2.344	-3.893	-1.986	-1.813	-2.142	-2.716	-1.327	-0.957	0.498	-2.433	-0.406	-0.378	-0.895	-3.695	-1.853	-0.201	-1.135	-0.661	-0.342	-1.092	1.494
Z1833927862	528654	528654:01:02_10.00	10	11.4	102	False	Active	LCH	71.7	0	0	59.8	0	64.3	37.2	71.7	10	17	25.7	56.8	33.5	Cc1ncsc1C(=O)N=c1[nH][nH]c2ccc(C(F)(F)F)cc12	260	11.82	22	PNP	cm	2	-2.195	-2.598	-1.665	-1.701	-2.365	-3.218	-2.03	-2.072	-2.24	-1.002	-1.134	-0.33	-0.297	0.673	-0.983	-1.528	-0.417	-0.701	-1.358	-1.055	0.794
Z2826956728	529002	529002:01:02_10.00	10	13.1	93	False	Active	LCH	69.4	0	0	60.7	0	57.9	26	69.4	59.4	35.8	49.3	66.1	44.8	CC(C)C1CC(NC(=O)c2csc(CCN)n2)c2ccccc21	456	19.83	23	PNP	cm	2	-0.534	-1.62	-1.426	0.502	-0.401	-0.08	2.822	-0.903	-1.349	-5.629	1.058	-0.323	0.8	-3.807	-3.148	1.604	-0.447	1.537	-0.153	0.659	0.504
Z829334752	528813	528813:01:02_10.00	10	16.2	84	False	Active	DNA_Synth	78.3	44	24.3	0	78.3	0	31.3	0	49.1	0	0	0	0	CC(C)c1cc(=NC(=O)c2cc3ccccc3n2C)[nH][nH]1	236	11.24	21	PNP	cm	2	1.835	2.122	0.76	3.703	3.232	2.591	-0.214	0.5	-1.258	-1.174	-1.797	-1.282	0.116	-1.155	-0.308	-2.487	0.869	1.217	-1.719	-0.511	-0.51
Z195572394	528705	528705:01:02_10.00	10	17.8	98	False	Active	MitoStress	67.9	0	0	51.2	0	47.1	25.2	65.6	67.9	16.9	31.2	61	18.2	CCOC(=O)c1sc2[nH]c(CN3CCCCC3C)nc(=N)c2c1C	453	18.88	24	PNP	cm, cm, fe	3	-1.367	-0.846	-0.284	-0.869	0.71	-1.346	2.895	0.147	-1.07	-4.061	0	0.317	1.765	-3.387	-1.997	0.391	-0.33	1.467	-1.076	-0.213	0.382
Z989410894	529258	529258:01:02_10.00	10	18.5	100	False	Active	Tubulin	72.6	0	0	68.9	0	68.6	27.5	61.3	8.8	43.2	58.1	72.6	60.5	O=[N+]([O-])c1cc(C(F)(F)F)c(Cl)cc1N1CCC(c2ccnn2CCO)CC1	443	15.82	28	PNP	cm	2	-4.473	-3.905	-3.547	-3.945	-4.115	-4.714	-0.249	0.612	-0.584	0	0.685	-0.107	1.325	0.087	0.854	0.298	-0.899	-1.093	-0.316	0.056	0.715
Z238767262	528990	528990:01:02_10.00	10	18.5	90	False	Active	Tubulin	80.6	0	0	78	0	77.7	48.2	77.6	15.4	39.8	55.7	80.6	64	CCOC(=O)c1[nH]c(C)c(-c2csc(=Nc3ccccn3)[nH]2)c1C	255	10.62	24	PNP	cm, cm	3	-6.986	-5.919	-6.522	-5.789	-5.519	-6.77	0.583	0.206	-0.966	-1.47	-0.195	-0.734	0	-1.646	-0.831	-0.576	0.13	0.441	-1.15	0.166	-0.198
Z966099900	528700	528700:01:02_10.00	10	20	95	False	Active	HDAC	76.6	0	0	73.8	0	76.6	52.1	67.3	0	38	56.5	74.9	61.9	CC(C)Cn1ncc2cc(C(=O)N=c3[nH]c(C(F)(F)F)cs3)cnc21	302	12.08	25	PNP	cm, fe	3	-5.4	-6.978	-4.959	-4.604	-4.119	-5.975	-0.944	0.783	-1.507	-0.066	-1.044	-0.053	0.434	-0.421	1.293	0.344	-0.266	0.862	-0.666	0.639	0.514
Z1002253800	529092	529092:01:02_10.00	10	20.2	83	False	Active	Tubulin	80.7	0	0	55	0	53.6	30.1	68	24.9	34.3	31	80.7	50.9	O=S(=O)(c1ccccc1N1CCC(c2cc[nH]n2)CC1)C(F)(F)F	413	17.21	24	PNP	cm	2	-0.318	-1	-0.108	-2.674	-2.085	-3.429	5.029	2.053	1.823	0.99	0.933	0.531	4.219	3.623	1.38	2.224	0.311	4.235	-1.334	-0.077	-0.391
Z2445066501	529061	529061:01:02_10.00	10	20.6	98	False	Active	LCH	87.8	0	0	75.7	0	80	12.6	87.8	15.5	47.8	51.8	69.5	42.9	CC1(CN)CCN(Cc2cccc(-n3cccn3)c2)C1	466	23.3	20	PNP	cm	2	0.379	1.043	0.746	0.1	-0.423	-0.295	2.038	0.24	-1.271	-3.052	-0.123	-0.41	3.268	0.246	-0.747	-0.029	0.388	0.554	-0.194	1.121	-0.515
Z56884058	528877	528877:01:02_10.00	10	23.5	94	False	Active	LCH	69.8	0	0	52.9	0	56.3	30.7	69.8	57.4	18.6	37.5	59.9	28.7	COC(=O)c1c(NC(=O)C2CCCO2)sc2c1CCCC2	439	20.9	21	PNP	cm	2	0.257	0.337	-0.197	0.528	-1.455	-0.151	-0.528	1.033	-2.861	-1.136	-0.107	-0.561	0	-1.159	1.431	-0.215	-1.074	-0.062	-1.665	0.481	0.563
Z1987499413	529024	529024:01:02_10.00	10	26.8	95	False	Active	DNA_Synth	77.9	74.1	0	0	77.9	0	27.5	0	12.7	0	0	0	0	CC(C)n1cnc(C(=O)NC2CC2c2cccc(Cl)c2)c1	432	20.57	21	PNP	cm	2	0.895	0.331	0.686	0.188	0.927	1.277	-8.17	-0.807	-1.946	2.973	3.136	1.365	-10.66	0.134	1.495	1.905	-0.815	1.65	-1.161	-0.792	0.925
Z216478460	528939	528939:01:02_10.00	10	27.6	78	False	Active	Tubulin	87.4	0	1.1	64.1	0	64.4	40.1	70	36.9	40.5	47.7	87.4	53.2	N#Cc1ccsc1NC(=O)C1CC1c1ccccc1C(F)(F)F	458	19.91	23	PNP	cm	2	-2.172	-1.57	-0.363	-2.51	-1.693	-2.478	3.976	0.833	0.646	0.217	0.939	-0.37	2.021	3.821	0.972	1.583	-0.691	3.117	-2.479	0.12	0.662
Z2755057603	528915	528915:01:02_10.00	10	30.6	89	False	Active	Tubulin	83.2	0	5.6	71.6	0	71.6	32.6	66.3	1.7	40.9	59.4	83.2	53	Cn1cc([N+](=O)[O-])c(C(=O)N2CCCc3c(Br)cc(Cl)cc32)n1	317	13.78	23	PNP	cm	2	-0.994	-1	-0.963	-1.914	-1.083	-3.339	6.688	2.029	-0.242	0.173	-0.52	-0.673	7	4.236	1.269	1.271	1.834	4.524	-0.928	3.022	-1.748
Z1578913905	529402	529402:01:02_10.00	10	35.1	91	False	Active	MitoStress	90.5	36.4	0	0	62.9	0	22.1	21.9	90.5	0	6.9	1	0	CCC1CCC(C)N1c1cc(C)nc(-c2ccccn2)n1	457	21.76	21	PNP	cm, cm, cm	3	2.606	-0.564	0.973	1.142	0.415	2.556	-4.832	-0.596	-3.546	-27.592	-0.331	-2.134	-46.568	-42.397	-22.41	-0.658	-1.028	-0.316	-2.256	-0.927	1.277
Z4735130732	528983	528983:01:02_10.00	10	35.9	97	False	Active	LCH	84.7	0	0	76.3	0	80.9	41.5	84.7	29.2	35.1	58	76.1	50.2	CCc1c(C(=O)Nc2sc(C)cc2C(N)=O)sc2ccccc12	250	10.87	23	PNP	cm	2	-3.028	-4.359	-1.808	-3.699	-3.821	-4.233	-0.833	0.158	-1.679	-3.101	-1.529	-1.478	1.085	-3.965	-1.164	-1.406	1.166	-1.52	-0.884	-0.35	-0.867
Z5177345660	529394	529394:01:02_10.00	10	36.1	105	False	Active	Tubulin	79	0	8.8	70.4	0	64.8	11.1	64.9	26.6	34.6	66	79	46.5	NC(=O)CNC(=O)c1[nH]ncc1NC(=O)c1ccc(Br)c2c[nH]nc12	265	10.6	25	PNP	cm	2	-3.315	-2.557	-1.923	-3.894	-3.286	-7.165	5.311	2.685	1.177	-1.663	-0.468	-1.345	7.278	2.172	0.033	0.054	1.002	2.356	-0.989	2.156	-0.943
Z4909999930	528823	528823:01:02_10.00	10	36.8	74	False	Active	Tubulin	90.5	0	5	64.3	0	66.6	26.9	64.6	23	51.9	52.1	90.5	41.8	CC(C)c1ccc2c(c1)CN(c1[nH]cnc(=N)c1Cl)CC2	302	14.38	21	PNP	cm	2	-2.805	0.209	0.008	-3.569	-2.601	-5.599	4.621	3.683	2.398	0.911	1.159	-0.191	4.054	3.692	2.535	2.276	-0.403	3.557	-2.309	0.048	0.408
Z1642870012	528828	528828:01:02_10.00	10	37.8	94	False	Active	MitoStress	80	55	0	0	79.6	0	22.1	0	80	0	0	0	0	Cc1cc(Br)c2oc(C(=O)N=c3[nH]cnn3C)cc2c1	219	10.95	20	PNP	cm	2	0.513	1.199	0.723	1.309	-0.012	0.795	-3.586	1.743	-4.373	-13.574	0.11	-0.613	-41.314	-26.775	-9.484	1.181	0.571	2.884	-3.35	0.675	0.054
Z30259505	528871	528871:01:02_10.00	10	38.2	100	False	Active	LCH	84.5	0	0	69.4	0	73.1	8.6	84.5	31.9	37.2	32.3	62.8	18.9	Cc1nn(CC(C)C)c2sc(C(=O)NC3CC(C)(C)NC(C)(C)C3)cc12	520	20	26	PNP	cm, fe	3	-1.878	-1.93	-1.016	-0.414	-0.232	-2.302	-1.499	-1.166	-2.71	-5.153	-1.785	-0.149	-0.211	-3.65	-1.633	-1.732	-0.122	-4.16	-0.187	-1.501	-0.166
Z2093329687	529335	529335:01:02_10.00	10	66.1	73	False	Active	Tubulin	89.8	0	0	68.3	0	68.9	37.1	74.5	43.9	43.7	49.8	89.8	46.5	CCOc1cc2[nH]ccc(=NCc3cc(C)nn3C)c2cc1OCC	272	10.88	25	PNP	cm	2	-4.843	-4.776	-1.115	-5.826	-5.611	-12.114	10.899	5.327	3.146	0.479	1.084	0.259	10.355	5.089	2.437	3.608	2.483	6.277	-4.597	1.52	-2.247
Z1188030578	529277	529277:01:02_10.00	10	76.3	60	False	Active	Tubulin	90.8	0	7.2	77.6	0	82.4	35.5	74.2	18.7	56.5	63.6	90.8	47.4	CC(Nc1ccc2scnc2c1)c1cccc(Cl)c1	238	12.53	19	PNP	fe	2	-5.949	-6.978	-3.298	-5.318	-5.931	-10.308	7.27	5.484	2.83	2.477	1.587	0.275	5.521	7.27	4.162	3.971	1.401	6.755	-3.597	2.149	-1.067
Z240245452	528825	528825:01:02_10.00	10	76.3	51	False	Active	Tubulin	85.1	0	35.7	68.8	0	77.2	25.2	59.7	1	56.9	61.7	85.1	31.6	Cc1cc(C(=O)Nc2sc(C)c(C)c2C#N)c2c(C)nn(C)c2n1	260	10.83	24	PNP	cm, cm, fe	3	2.889	9.322	8.326	3.49	7.068	-1.918	16.098	7.945	6.787	3.475	1.872	-0.23	12.598	10.672	4.919	5.425	2.044	5.181	-1.196	3.359	-1.694
Z1266823409	528931	528931:01:02_10.00	10	83.6	54	False	Active	Tubulin	86	0	17	72.9	0	77.3	30.5	71.4	32.6	55	63.1	86	39.8	Cc1cc(CNC2CCCC2)c2ccccc2n1	297	16.5	18	PNP	cm	2	-4.831	-0.384	0.895	-6.13	-2.63	-10.96	17.857	9.639	7.129	1.545	1.933	-0.253	11.737	9.595	3.433	5.891	2.503	7.738	-4.066	3.767	-2.204
Z127371980	528883	528883:01:02_30.00	30	5	98	False	Active	DNA_Synth	63.1	41.5	5.5	0	63.1	0	30.5	2.9	17.6	0	6.4	10.6	22.2	c1csc(CN=c2[nH]cnc3ccccc23)c1	180	10.59	17	PNP	cm	2	2.294	3.501	0.889	2.455	2.341	2.055	0.363	2.296	1.332	0.49	0.209	-0.388	0.04	-0.061	0.518	0.204	0.03	1.651	-0.84	0.414	0.154
Z1095004066	528679	528679:01:02_30.00	30	5.2	105	False	Active	BET	74.4	0	0	74.4	0	73.5	22.2	58.8	26.2	40.3	58.3	73.1	41.4	CCc1nnc2ccc(=NCc3ccc(OC)nc3)[nH]n12	226	10.76	21	PNP	cm, fe	3	-3.951	-2.424	-2.641	-2.636	-2.275	-4.52	1.161	0.704	0.116	-0.175	-0.092	-0.477	1.146	0.206	0.545	0.865	0.057	0.416	-0.169	0.366	0.095
Z2212926414	529008	529008:01:02_30.00	30	5.2	93	False	Active	MitoStress	75.3	20.4	0	0	47.2	0	27.3	25	75.3	0	0	20.8	0	CCC(CC)C(=O)N1CCN(C(=O)C2CCc3cccc(OC)c32)CC1	510	19.62	26	PNP	cm	2	-0.382	-0.601	-1.216	-0.252	0.28	0.968	0.539	2.439	0.651	-1.677	-0.095	0.392	-1.253	-2.877	-0.335	0.338	-0.01	0.969	-1.025	-0.007	0.257
Z238766162	528709	528709:01:02_30.00	30	5.2	97	False	Active	LCH	50.7	0	0	43.3	0	43.2	27.5	50.7	33.3	13.7	27.8	49.6	11.7	Cc1cc(-c2csc(=Nc3ccccn3)[nH]2)c(C)n1CC(F)(F)F	281	11.71	24	PNP	cm, cm	3	-2.118	-0.601	-1.208	-1.85	-1.23	-1.073	-1.302	-0.281	-1.16	-1.27	0.073	-0.1	0.896	-2.159	-0.799	-3.973	-0.464	0.362	0.01	-0.712	0.361
Z1652192371	529101	529101:01:02_30.00	30	5.2	101	False	Active	HSP90	57	44.4	0	0	44.7	0	57	0	40.2	0	0	0	0	Cc1ccnc(N2CCC(n3cc(Br)cn3)CC2)c1C#N	335	15.95	21	PNP	cm, cm	3	1.01	-0.556	0.045	2.051	0.922	2.952	-0.355	0.657	0.762	-0.842	0.225	0.103	-0.912	-0.684	0.878	-0.129	-0.714	-0.803	-0.985	-1.072	0.742
Z1268663687	529293	529293:01:02_30.00	30	5.4	93	False	Active	LCH	57.7	33.4	0	22.8	47.4	17.6	0	57.7	57.4	3.6	8.5	34.2	28.1	CC(C)(C)c1ncc(CNCC2CCCn3ccnc32)s1	393	18.71	21	PNP	cm	2	-0.77	-1.269	-1.727	0.057	0.841	-0.364	-1.029	-0.247	-0.628	-3.726	0.176	-0.341	-1.76	-5.406	-2.103	-0.885	-2.18	-0.225	-0.676	-1.049	2.463
Z4262246334	529382	529382:01:02_30.00	30	5.5	97	False	Active	Uncoupler	68.8	23.1	0	51.1	0	54.8	28.5	54.3	0	13.5	50.5	46.6	68.8	O=C(Nc1ccc(OS(=O)(=O)F)cc1)c1cnn(C2CC2(F)F)c1	453	18.88	24	PNP	cm	2	-1.275	-6.769	-5.971	-2.672	-3.299	0.76	-0.133	1.593	-0.243	-0.471	-1.445	-1.616	0.709	1.08	-0.037	0.772	0.25	0.354	-0.127	0.54	-0.207
Z146425436	528894	528894:01:02_30.00	30	5.5	103	False	Active	AKT_PI3K_MTOR	70.1	70.1	0	0	65	0	48.9	0	46	0	0	0	2.6	CCC1c2ccsc2CCN1C(=O)C1CC=CCC1	499	26.26	19	PNP	cm	2	-1.56	-0.595	0.695	-0.17	0.014	0.191	-1.624	0.562	0.76	-0.146	0.108	-0.181	-0.763	-1.598	0.809	0.769	-0.602	-0.225	-1.416	0.572	0.478
Z2372610665	528986	528986:01:02_30.00	30	5.5	98	False	Active	MitoStress	60.8	0	0	21.8	0	19.3	30.3	44.3	60.8	2.6	10.3	28.1	0	CCc1cc(=NC(=O)c2c(C)nn3c(C)cc(C)nc23)[nH]n1C	257	11.17	23	PNP	cm, cm, fe	3	-1.165	-0.181	-0.517	-0.234	-0.736	-0.075	-0.59	0.832	0.979	-2.486	-0.097	0	-0.477	-4.633	-1.125	0.385	-0.762	-0.9	-0.275	-1.013	0.945
EN300-110890	529418	529418:01:02_30.00	30	5.7	99	False	Active	Tubulin	60.8	0	0	53.9	0	58.7	42.1	33	0	40.2	60	60.8	40.6	O=c1[nH]cnc2c1cnn2Cc1ccc(Cl)cc1	197	10.94	18	PNP	fe	2	0.098	-0.87	-0.02	-0.347	-0.398	-0.627	0.588	-0.915	-2.085	0.645	0.288	-1.605	1.179	0.597	-0.433	0.924	0.285	-0.038	0.922	0.551	-0.344
Z1579829973	529086	529086:01:02_30.00	30	5.7	96	False	Active	MitoStress	67.5	10.7	0	23.4	0	12.7	23.4	38.8	67.5	0	7.5	32.5	14.6	Cc1cc(CN(C)C2(C(N)=O)CCCC2)c2ccccc2n1	379	17.23	22	PNP	cm	2	-2.169	-1.229	-1.03	-3.639	-3.165	-0.407	1.091	0.499	-0.252	-1.506	-0.781	-0.974	1.013	-2.267	-0.44	-0.81	-0.579	-0.136	-1.318	-0.348	0.248
Z989391582	528671	528671:01:02_30.00	30	5.7	85	False	Active	LCH	66	20.5	0	51.3	0	51.4	28.3	66	42.9	16.3	52.3	56.4	63.7	CCOc1ncnc2c1CN(c1cc(C)[nH]c(=N)n1)CC2	292	13.9	21	PNP	cm	2	-1.312	-2.011	-3.928	-2.691	-3.753	-0.74	0.236	1.09	0.744	-1.464	-0.636	-1.22	-0.707	-1.524	-0.304	0.051	0.177	0.683	-0.311	0.893	-0.146
Z2073445831	509218	509218:02:02_30.00	30	5.9	86	False	Active	DNA_Synth	65.7	57.7	0	0	65.7	0	43.1	0	46.8	0	0	2.6	4.4	NC(=O)c1[nH]nc2ccc(NC(=O)c3sccc3Cl)cc12	225	10.71	21	PNP	cm	2	0.843	3.042	2.194	2.398	1.914	0.318	4.958	2.532	1.001	-1.033	0.535	-0.956	-1.457	-0.913	-1.518	-0.543	-0.482	1.164	-1.441	-0.522	0.753
Z1994555355	529441	529441:01:02_30.00	30	6	96	False	Active	MitoStress	57.1	0	7.9	20.7	5.8	16.8	31.7	26.6	57.1	0	42.3	42.8	12.1	OC1CC(c2cccc(F)c2)N(Cc2ccon2)C1	454	23.89	19	PNP	cm	2	1.265	0.601	0.415	0.196	-0.32	0.143	0.278	0.051	-0.545	-0.078	-0.278	-0.756	1.57	0.659	0.426	1.151	0.624	1.394	-1.452	0.761	-0.545
Z109632196	529141	529141:01:02_30.00	30	6	100	False	Active	HSP90	62.4	12.3	0	18.9	0	15.9	62.4	35.3	55.1	0	16.1	38.4	14.3	CC(=O)c1ccc(C(=O)N=c2[nH]c3c(C)ccc(C)c3s2)s1	239	10.86	22	PNP	cm	2	-1.01	-1.307	-1.14	-2.283	-1.613	-2.691	-0.341	0.405	-0.91	-2.671	-0.165	-0.086	-0.51	-3.93	-0.221	-0.989	-0.606	-0.612	-1.602	-0.71	0.671
Z1192143929	529212	529212:01:02_30.00	30	6	95	False	Active	DNA_Synth	85.2	44.1	8.8	0	85.2	0	6.7	0	59.1	0	0	0	0	CCSc1cncc(N(C)Cc2nnc3ccccn23)n1	230	10.95	21	PNP	cm, cm, fe	3	2.344	1.031	1.795	3.628	2.889	1.911	-0.237	0.747	-1.529	-0.81	0.545	0.182	-0.147	-0.796	-0.904	0.159	-1.549	0.595	-1.043	-1.457	1.857
Z1874210456	528642	528642:01:02_30.00	30	6.2	95	False	Active	LCH	53.5	36.9	0	28.4	5	28.3	32.9	53.5	46.1	0	4.1	36.8	39.1	N=c1[nH]cnc(N2CCc3c(F)cc(F)cc3C2)c1Cl	285	14.25	20	PNP	cm	2	-2.296	-0.595	-0.875	-4.141	-2.942	-2.09	0.771	0.563	-3.207	-3.211	-1.023	-0.514	-0.63	-0.982	0.609	-1.038	-1.18	-1.948	-0.51	-0.224	1.483
Z1331297419	529005	529005:01:02_30.00	30	6.4	93	False	Active	MitoStress	63.9	39.1	0	9	46.5	1.9	23.6	53.3	63.9	0	10.9	18.1	18.1	CCCc1nc(C)c(C(=O)NC2c3ccccc3CC2O)s1	439	19.95	22	PNP	cm	2	0.543	-1.345	-0.87	-2.861	-0.879	0.702	-1.544	1.023	-1.377	-2.171	-1.576	-0.542	-0.953	-4.309	-0.356	-2.124	-0.869	0.458	-1.143	0.129	0.944
Z2630738954	529033	529033:01:02_30.00	30	6.4	101	False	Active	MitoStress	57	12.5	0	18.8	1.8	16	46.2	29.6	57	0	29.1	33.6	29.2	Cc1ccccc1C1CC1C(=O)Nc1sccc1S(C)(=O)=O	454	20.64	22	PNP	cm	2	-2.203	-2.285	-2.568	-1.668	-2.575	-1.104	-1.255	-0.075	-0.496	-0.168	-1.631	-0.451	-0.85	0.19	0.02	-0.484	0.955	0.218	-2.481	1.495	-0.69
Z2274348995	528913	528913:01:02_30.00	30	6.6	98	False	Active	LCH	68.5	0	0	44.8	0	41.7	13.8	68.5	61.4	13.8	11.3	50.7	15	CCC(C)N1CCN(c2ncnc(-n3cccn3)c2N)CC1	388	17.64	22	PNP	cm, cm, cm	3	-0.591	-0.186	-1.015	-0.822	0.094	-0.358	-0.16	1.026	0.429	-0.723	-0.996	-0.343	0.191	-1.836	0.17	0	-1.069	-1.381	-0.546	-0.736	1.162
Z1134306708	529274	529274:01:02_30.00	30	6.7	92	False	Active	HSP90	66	39.8	0	26.1	1.8	34.2	66	46.6	35.5	0	34	43.4	53.8	CN(C(=O)c1sccc1OC(F)F)c1nc2ccccc2s1	244	11.09	22	PNP	cm	2	-3.121	-2.241	-2.791	-2.608	-4.939	-1.357	-0.257	-0.18	-2.447	0.979	-1.763	-1.038	-0.622	-1.291	1.348	-1.406	-0.691	-0.215	-1.125	1.001	0.455
Z1539231813	529305	529305:01:02_30.00	30	6.9	92	False	Active	Tubulin	51	45.9	0	17.3	41.9	16.6	41.2	49.4	49.2	0	13.4	51	43.1	CCc1ncnc(N2CCC(c3cnn(CC)c3)CC2)c1F	357	16.23	22	PNP	cm, cm	3	0.536	-1.345	-2.493	1.282	-0.295	1.639	-0.111	1.366	-0.627	-1.478	0.129	-0.876	-1.547	-2.473	-1.037	0.508	0.481	0.931	-0.556	0.373	-0.37
Z2910078736	528815	528815:01:02_30.00	30	6.9	93	False	Active	Tubulin	69.9	0	0	65.7	0	62.9	46	66.1	20.9	29.1	48	69.9	61.4	CC(NC(=O)C1CCC1)c1nc2cc(Cl)c(Cl)cc2[nH]1	339	16.95	20	PNP	cm	2	-3.43	-2.177	-1.425	-5.736	-2.223	-4.42	0.448	0.404	-2.45	-1.219	0.481	-0.368	0.938	-1.351	-0.387	-0.966	-1.636	-0.78	-1.018	-0.107	2.011
Z1233966031	529301	529301:01:02_30.00	30	6.9	103	False	Active	MitoStress	65.1	0	0	21.9	0	22.4	45.7	39.3	65.1	0	26.6	34.2	6.4	CCOC(C)c1noc(CN2CCCC(c3ccnn3C)C2)n1	477	20.74	23	PNP	cm	2	-1.442	0.856	0.276	-1.009	0.508	0.874	-1.256	-0.465	-0.955	-1.295	-1.25	-0.463	-0.518	-2.91	-0.05	-0.178	-0.166	-0.019	-1.419	0.246	0.032
Z102118372	529150	529150:01:02_30.00	30	7.3	91	False	Active	MitoStress	64.7	0	0.6	17	0	20.6	48.3	42.1	64.7	0	16.8	28.2	0	CCn1c(CNC(=O)C2CCC2)nc2ccccc21	293	15.42	19	PNP	cm	2	0.411	-0.863	-1.398	0.242	0.043	0.444	-0.089	0.65	0.606	-3.055	-1.525	-0.122	0	-2.989	-0.543	-0.14	0.183	-0.666	-1.071	0.105	-0.123
Z94821664	528803	528803:01:02_30.00	30	7.6	88	False	Active	MitoStress	68	11	0	4.9	40.3	0	41.2	25	68	0	12.6	39.3	10.5	CNC(=O)CN(C)c1nc(-c2cccs2)nc2sc3c(c12)CCC3	318	13.25	24	PNP	cm, cm, fe	3	-0.922	1.662	1.252	-1.53	-0.915	-0.905	3.093	2.554	1.763	-0.74	0.928	-1.269	-0.545	-0.608	-1.014	0.953	0.445	0.788	-1.616	0.387	-0.141
Z1796449560	528718	528718:01:02_30.00	30	7.6	95	False	Active	LCH	74	2.7	0	54.6	0	60.1	22.8	74	4.2	23.2	35	51.5	59.6	CC1(C)CN(C(=O)c2ccc([N+](=O)[O-])[nH]2)CC2(CCCC2)O1	504	22.91	22	PNP	cm, cm, fs	3	-0.921	-2.482	-4.561	-3.951	-1.269	0.525	0.318	-0.084	-1.886	-0.045	0.136	-0.28	-0.398	0.848	0.292	-0.688	-0.273	0.354	-0.159	-0.238	0.435
Z1952704289	528974	528974:01:02_30.00	30	7.8	101	False	Active	MitoStress	62.9	45.9	0	0	50.6	0	27.7	40.2	62.9	0	9.2	11.8	7.1	CCn1c(=NC(=O)c2csc(C(F)(F)F)n2)[nH]c2cc(C)ccc21	285	11.88	24	PNP	cm	2	-0.976	-0.186	-0.849	0.149	0.19	0.629	-1.745	-1.068	-2.265	-4.227	-0.91	-0.426	-2.261	-8.58	-1.98	-2.489	-0.771	0.09	-1.679	-0.535	1.158
Z1567827711	528834	528834:01:02_30.00	30	7.9	91	False	Active	MitoStress	70.9	0	0	30.1	0	30.9	40.3	45.1	70.9	3.9	42.1	47.8	20.9	CCc1[nH]cnc(=NCc2cn3cccc(C)c3n2)c1F	231	11	21	PNP	cm, fe	3	-0.179	-1.345	-0.37	-1.486	-2.27	-0.638	0.798	1.835	1.604	-1.252	-0.6	-0.51	0.709	-5.297	-0.232	0.797	0.522	0.16	-1.43	1.197	-0.394
Z1173325149	528832	528832:01:02_30.00	30	7.9	102	False	Active	Uncoupler	66.4	0.1	0	61.4	0	64.6	44.2	64.7	18.9	33.8	58.6	65.6	66.4	Cc1cccc([N+](=O)[O-])c1N1CCC(c2ccnn2C)CC1	352	16	22	PNP	cm	2	-2.819	-2.547	-3.815	-0.496	-1.409	-2.986	1.303	1.019	-1.062	-1.274	-0.264	-0.731	1.68	-0.636	-0.098	-1.257	0.479	0.629	-0.764	1.598	-0.323
Z1318707669	529270	529270:01:02_30.00	30	8.3	96	False	Active	MitoStress	72.7	23	0	36.7	10.3	33.4	39.7	59.5	72.7	1.7	37.1	56.2	40.6	CC(C)c1cc(C(=O)NC2CC2c2ccccc2)nn1C	432	20.57	21	PNP	cm	2	-2.247	-1.988	-2.021	-3.416	-2.471	-1.194	-0.466	0.681	-1.273	-3.097	-0.012	-0.801	-1.409	-4.082	-1.345	-0.096	0.82	0.163	-2.405	0.898	-1.001
Z1224510013	529196	529196:01:02_30.00	30	8.8	105	False	Active	MitoStress	63.7	0	0	39.2	0	44.8	44.5	47.3	63.7	12.8	39.5	50.7	17.5	Cc1cc(CSc2nncn2C(C)C)c2ccccc2n1	240	11.43	21	PNP	cm	2	-1.978	-0.817	-1.125	-0.915	-1.138	-0.823	1.724	1.192	2.446	-3.479	-0.453	-0.536	2.017	-3.011	-0.9	0.028	0.944	0.555	-1.458	0.899	-1.233
Z1343326967	529122	529122:01:02_30.00	30	9	86	False	Active	LCH	74.7	0	0	47.8	0	44.9	5.8	74.7	43.7	12.7	5.3	42	28.5	Cc1nccn1CC1CCCN1c1ccnc(C(C)(C)C)n1	416	18.91	22	PNP	cm, cm, cm	3	-0.866	-2.612	-2.285	-0.307	-1.787	0.839	-0.325	-0.723	-3.319	-2.286	-1.296	0.082	-0.96	-2.869	-0.546	-1.703	-2.779	-2.006	-0.978	-2.445	3.213
Z1973182906	528954	528954:01:02_30.00	30	9.3	106	False	Active	HSP90	54.2	0	0	28.1	0	27.5	54.2	39.4	45.3	0	32.2	46.9	28.9	Cc1[nH]nc(C(C)C)c1C(=O)NC1CC1c1ccccc1Br	445	20.23	22	PNP	cm	2	-2.811	-1.798	-2.208	-2.662	-0.735	-2.168	1.349	1.091	0.013	-0.546	-1.45	-0.272	1.098	-0.167	-0.547	-1.022	1.186	0.174	-2.112	0.558	-0.906
Z1170303504	529280	529280:01:02_30.00	30	9.5	96	False	Active	DNA_Synth	81.7	50.8	6.1	0	81.7	0	0	0	0	0	0	0	0	CCc1cc(=NC(=O)c2ccc3nccn3c2)[nH][nH]1	205	10.79	19	PNP	cm, fe	3	3.701	2.459	1.653	2.989	3.691	2.694	-0.853	-0.291	0.664	1.176	1.154	0.66	-2.025	0.857	0.537	0.264	-1.441	0.062	0.287	-1.866	1.367
Z1268664185	528960	528960:01:02_30.00	30	9.7	97	False	Active	MitoStress	71	19	0	17.9	23	7.3	23.7	47.8	71	0	7.3	28.4	5.9	Cc1cn2c(n1)C(CNCc1ccc(C)s1)CCC2	352	18.53	19	PNP	cm	2	-1.167	-0.601	-0.172	-2.046	-1.936	-0.073	-0.536	-1.043	-1.201	-2.824	-0.789	-0.54	-0.342	-2.16	-1.686	-1.878	-0.643	0.738	-1.359	-0.886	0.737
Z2033610895	529317	529317:01:02_30.00	30	10	93	False	Active	LCH	72.2	0	0	55.5	0	58.1	41.7	72.2	57.1	7.8	43.6	61.2	34.5	CN(C)c1n[nH]c(C2CCN(c3ccc(C#N)cc3[N+](=O)[O-])CC2)n1	375	15	25	PNP	cm	2	-2.488	-1.988	-1.956	-0.449	1.111	-3.116	0.579	-0.028	-1.664	-1.683	-1.559	-0.919	1.076	-3.303	-1.677	-1.183	-0.642	0.085	-1.203	0.699	0.813
Z1139333871	529395	529395:01:02_30.00	30	10.4	104	False	Active	LCH	65.5	2.9	0	42.7	19.7	47.1	19.4	65.5	35.6	13.3	34.8	54.7	49.9	CCN(CC)Cc1ccc(C(=O)N2CCCC2C2CCCN2CC)o1	614	24.56	25	PNP	cm, cm, cm	3	0.578	1.529	1.142	1.361	1.376	-0.695	2.088	-0.085	-5.091	-1.078	-0.158	-1.52	0.528	1.144	-1.405	0.24	0.364	0.524	-0.085	0.747	-0.379
Z1066507488	528688	528688:01:02_30.00	30	10.4	98	False	Active	Uncoupler	57.8	32.6	0	31.6	16.7	23.6	32.9	51.9	20.9	0	13.7	53.5	57.8	Cn1ncc(C(=O)N=c2[nH]c3ccc(Cl)cc3s2)c1C(F)F	249	11.32	22	PNP	cm	2	-2.983	-3.636	-5.06	-5.02	-5.054	-3.619	1.514	0.129	-0.493	0.138	0.32	-0.429	0.479	0.702	0.517	-0.717	-0.294	0.896	-1.933	-0.237	0.411
Z1823930494	529186	529186:01:02_30.00	30	10.4	93	False	Active	MitoStress	62.6	20.2	0	30.9	0	40.5	61.8	53.5	62.6	0	31.3	44.8	38.3	COc1ccc(OC)c(C2CC2C(=O)Nc2sccc2C#N)c1	433	18.83	23	PNP	cm	2	-1.74	-1.849	-1.995	-3.341	-2.755	-0.885	-0.032	0.67	-0.774	-1.969	-0.444	-0.853	-0.834	-1.12	0.509	-0.889	-0.322	-0.512	-1.783	-0.25	0.284
Z1530433491	528968	528968:01:02_30.00	30	10.5	93	False	Active	Tubulin	76.8	0	0	65.3	0	63.8	33	72	33	20	56	76.8	50.5	Cc1nc(C)c(C(=O)N=c2[nH][nH]c3ccc([N+](=O)[O-])cc23)s1	238	10.82	22	PNP	cm	2	-3.941	-0.601	-1.207	-2.693	-1.876	-1.448	1.641	1.387	-0.941	-0.068	-1.506	0.105	1.7	0.723	1.157	1.938	0.519	2.17	-0.87	1.549	-0.533
Z1894892074	528667	528667:01:02_30.00	30	10.7	89	False	Active	LCH	74	13.7	0	59.1	0	54.1	37.6	74	39.8	9.1	39	62.1	58.2	COc1ccc2c(=NC(=O)c3sc(C)nc3C)[nH][nH]c2c1	227	10.81	21	PNP	cm	2	-4.186	-6.769	-4.905	-3.881	-3.515	-3.622	-0.212	0.187	-1.343	-1.901	-1.492	-0.369	0.782	-1.142	-0.149	-1.563	-0.416	0.144	-0.77	-0.484	0.563
Z1309539506	528835	528835:01:02_30.00	30	10.9	81	False	Active	DNA_Synth	79.8	17.3	59.1	0	79.8	0	15.1	0	22.3	0	0	0	0	COCc1nc(=Nc2ccc3c(c2)oc(=O)n3C)cc(C)[nH]1	243	11.05	22	PNP	cm, fe	4	12.541	8.174	8.902	6.981	9.741	8.463	1.426	1.745	0.525	0.618	0.29	-0.252	0.418	3.154	1.199	1.801	0.826	1.563	-0.279	0.115	-0.823
Z1530419938	528836	528836:01:02_30.00	30	11.1	98	False	Active	LCH	67.8	6.9	0	54	0	59.7	57.2	67.8	53	18.4	47.7	62.4	55.6	Cc1ccoc1C(=O)N=c1[nH][nH]c2ccc([N+](=O)[O-])cc12	225	10.71	21	PNP	cm	2	-2.412	-3.721	-4.753	-2.079	-2.805	-1.687	0.603	-0.655	-3.615	-1.795	-0.117	-2.161	-0.583	-0.521	-1.277	1.176	0.096	0.745	-0.926	0.062	0.017
Z203040794	529166	529166:01:02_30.00	30	11.1	97	False	Active	DNA_Synth	59.5	10.3	22.9	0	59.5	0	19.2	0	57.3	0	0	0	0	CCOC(=O)c1cc(-c2ccccc2)c(N2CCOCC2)s1	327	14.86	22	PNP	cm	2	2.961	7.239	4.521	5.396	4.706	1.415	-0.974	0.585	-1.187	-1.334	-0.76	-0.153	2.317	-0.421	-0.537	-0.538	0.064	-0.236	-1.883	-0.734	0.088
Z88360701	528886	528886:01:02_30.00	30	11.1	100	False	Active	MitoStress	58.4	6	0	22.7	0	17.4	42.9	40.7	58.4	0	14.7	31.6	3.6	COC(=O)c1c(NC(=O)c2cc3ccccc3s2)sc(C)c1C	247	10.74	23	PNP	cm	2	-1.897	-1.269	0.094	-2.169	-0.319	-2.509	0.573	0.816	-2.93	-3.206	-0.885	0.002	-0.789	-5.558	-1.212	-0.716	-1.111	-1.221	-1.715	-1.485	1.757
Z1497354166	529026	529026:01:02_30.00	30	11.1	105	False	Active	MitoStress	63.3	19.3	0	0	13.7	0	47	10.8	63.3	0	0	0.4	0	CC1(C)CC1C(=O)N1CCN(c2cccc(Cl)c2)CC1	493	24.65	20	PNP	cm	2	0.784	-0.371	-0.945	0.506	-0.415	0.908	-0.61	0.371	-2.206	-2.487	0.136	-0.049	-0.102	-2.538	-0.081	-0.789	-0.482	-0.27	-2.014	-0.644	0.644
Z639464340	528924	528924:01:02_30.00	30	11.1	98	False	Active	LCH	63.4	20.8	0	52.4	0	54	33.1	63.4	50.5	13.1	42.7	54.9	50.5	CNC(=O)c1ccc(NC(=O)c2cc(C3CC3)n(C(C)(C)C)n2)cc1	356	14.24	25	PNP	cm	2	-3.175	-2.406	-2.431	-6.072	-3.818	-2.482	-0.364	-2.276	-6.401	-4.84	-1.96	-0.693	0	-4.43	-2.049	-0.755	-0.696	0.009	-0.98	-0.319	0.658
Z146259236	529146	529146:01:02_30.00	30	11.6	96	False	Active	MitoStress	64.5	0	0	33.8	0	37.1	37.6	53.5	64.5	0	18.2	47	5.1	CC(C)(C)NC(=O)CNC(=O)c1cc(-c2ccccc2)c(N2CCOCC2)s1	409	14.61	28	PNP	cm	2	-0.124	-0.595	0.818	-0.867	-0.331	-0.541	0.969	0.609	-1.795	-1.735	-0.455	0.044	0.112	-2.048	-0.973	-0.106	-0.411	-0.36	-2.047	0.137	-0.165
Z1743374561	528758	528758:01:02_30.00	30	11.6	84	False	Active	DNA_Synth	56.3	53.8	0	0	56.3	0	39.4	25.3	52	0	0	26.3	32.6	CC(C)(C)c1nsc(N2CCN(c3ncccn3)CC2)n1	343	16.33	21	PNP	cm	2	-2.576	-3.358	-3.669	-1.813	-2.684	0.721	0.574	2.413	0.934	-1.097	-0.52	-0.477	0	-2.488	0.107	-0.522	-0.168	1.781	-2.285	0.236	0.357
Z223843866	528977	528977:01:02_30.00	30	12.3	99	False	Active	HSP90	57.3	22.6	0	14.9	0	11.2	57.3	34.1	41.4	0	2	34.3	22	CC(C)CCn1c(N2CCCCC2)nc2c1c(=O)n(C)c(=O)n2C	375	15.62	24	PNP	cm	2	-2.127	-1.341	-2.491	-0.79	-0.844	-1.355	0.209	0.65	1.449	0.178	-0.162	-1.716	-0.425	-0.828	0.192	1.781	-0.17	0.121	-1.897	0.171	0.569
Z2959955942	528712	528712:01:02_30.00	30	12.3	95	False	Active	HSP90	61.6	52.1	0	0	47.9	0	61.6	3.8	43.6	0	0	0	0	CC(C)(C)Cc1ncc(C(=O)N=c2[nH][nH]c3cc(O)ccc23)s1	271	11.78	23	PNP	cm	2	1.485	0.677	-0.389	1.241	1.099	1.948	-0.221	1.132	2.294	-0.712	0.669	0.976	0.203	-4.402	0.417	0.38	-0.57	-0.479	-1.748	-1.11	0.787
Z961104376	529225	529225:01:02_30.00	30	12.3	98	False	Active	MitoStress	67.9	46.5	0	0	65	0	47.3	7.2	67.9	0	0	0	0	CCOC(=O)c1c[nH]c2ccccc2c1=NCC1CCCO1	387	17.59	22	PNP	cm	2	1.26	0.407	0.24	0.05	-0.867	0.742	0.278	0.202	0.595	-1.5	-0.209	0.488	-0.058	-1.448	0.164	-0.179	-0.203	0.788	-2.392	-0.124	-0.165
Z31167366	528901	528901:01:02_30.00	30	12.4	98	False	Active	LCH	83.4	0	0	56.2	0	55.5	28.5	83.4	56.8	9.1	26.4	60.4	34.2	CCOC(=O)c1sc2[nH]c(CN3CCCCC3)nc(=NCCC(=O)OC)c2c1C	427	14.72	29	PNP	cm, cm, fe	3	-2.385	-1.137	-2.218	-2.337	-1.483	-1.767	0.317	-0.604	-1.719	-4.236	-2.911	0.604	1.955	-4.82	-1.064	-3.354	0.205	0.089	-0.767	-0.13	-0.156
Z152953646	529170	529170:01:02_30.00	30	12.8	97	False	Active	MitoStress	68.1	0	0	19.9	0	15.8	39.4	40.2	68.1	0	9.1	33	0	Cc1nn(Cc2ccc(-n3cccn3)cc2)c(C)c1[N+](=O)[O-]	238	10.82	22	PNP	cm	2	-0.159	0.468	-1.504	0.337	0.178	-1.016	-0.556	-1.513	-2.3	-2.814	-1.163	0.005	0.651	-3.175	-0.799	-0.671	-0.24	0.201	-2.395	-0.336	0.322
Z2682987787	529058	529058:01:02_30.00	30	13	90	False	Active	AKT_PI3K_MTOR	68.7	68.7	0	0	56.1	0	36.2	27.9	47.9	0	9.3	22.3	39.9	COC1CCN(c2ccnc(-c3cncc(Br)c3)n2)C1	370	18.5	20	PNP	cm, cm, cm	3	-2.922	-4.408	-3.722	-2.505	-1.983	-1.438	1.013	1.015	-0.213	-2.07	-0.721	-2.372	-0.343	-1.346	-1.232	0	0.003	2.12	-1.529	0.135	0.081
Z164860426	529132	529132:01:02_30.00	30	13.1	105	False	Active	MitoStress	62.7	0	1	37.9	0	36.2	8.4	60.4	62.7	15.1	21.2	44.5	4.1	CS(=O)(=O)NCCc1ccc(C(=O)N=c2[nH]c3ccccc3s2)s1	281	11.71	24	PNP	cm	2	0.302	0.111	0.875	1.946	2.347	0.263	-2.839	-2.232	-0.109	-5.124	-2.619	-0.197	-10.026	2.344	-3.399	0.291	-0.031	-0.436	-2.198	-0.17	0.049
Z108938506	528887	528887:01:02_30.00	30	13.5	86	False	Active	Uncoupler	54.3	41	0	12.4	47.5	10.9	21.9	31.3	27	0	31.3	41.4	54.3	Cn1cc(C(=O)N=c2[nH]c3ccc(F)cc3s2)cn1	206	10.84	19	PNP	cm	2	-2.539	-0.736	-2.176	-2.012	-2.815	-1.755	0.948	0.112	-0.944	-0.842	0.836	-2.548	-0.058	0.303	-1.769	1.133	0.708	2.239	-0.983	0.959	-0.646
Z2375527175	509141	509141:02:02_30.00	30	14	109	False	Active	MitoStress	65	0	0	31.3	0	34.2	40.8	46	65	0	36.5	41	17.6	NC1CCN(C(=O)c2cc(F)cc3nccnc23)C1	362	19.05	19	PNP	cm	2	-1.459	-1.504	-1.496	-0.696	-1.386	-1.406	-1.105	-0.246	0.531	-0.434	-1.394	-1.653	-0.865	-1.513	0.31	-1.371	-0.424	0.048	-1.722	0.105	0.232
Z27666265	528976	528976:01:02_30.00	30	14.3	95	False	Active	Uncoupler	71.9	16.8	0	60.7	0	62.9	57.8	56.9	13.2	27.8	65	65.4	71.9	O=C(N=c1[nH]c2ccccc2[nH]1)C1CCCC1	280	16.47	17	PNP	cm	2	-4.616	-4.761	-5.366	-5.924	-5.073	-6.072	-2.044	-0.818	-3.465	-3.227	0.318	-1.449	-0.866	-2.826	-1.009	-0.073	0.463	1.215	-0.554	0.648	-0.685
Z2460245482	528812	528812:01:02_30.00	30	15.2	91	False	Active	HDAC	67.7	0	0	63	0	67.7	27.5	64.9	38.9	35	32.3	66.7	26.1	Cc1c(C(C)C)[nH][nH]c1=NC(=O)c1cc2ccccc2n1C	249	11.32	22	PNP	cm	2	-1.746	0.34	-0.441	-1.841	-1.2	-3.095	-0.548	-0.678	-0.784	0	-0.365	-0.91	0.144	-0.791	0.488	-0.505	-0.714	-1.979	-1.961	-0.518	0.601
Z2091650549	528783	528783:01:02_30.00	30	15.4	87	False	Active	MitoStress	63.9	3.8	0	23.4	0	21.8	50.6	44.2	63.9	0	20.1	41.6	13.3	COc1cc(OC)nc(N2CCOC(c3ccco3)C2)n1	390	18.57	21	PNP	cm, cm, cm	3	-0.843	-2.22	0.006	-0.698	0.241	-0.737	0.202	-1.379	-0.212	-1.697	-0.545	-1.307	-0.321	-1.853	-0.941	0.186	-0.886	0.879	-1.51	-1.083	1.113
Z2252066711	529030	529030:01:02_30.00	30	15.4	88	False	Active	DNA_Synth	95.1	57.9	12.7	0	95.1	0	0	0	31.8	0	0	0	0	CCC(=O)C1(C(=O)N2CCN(c3ccc(O)cc3)CC2)CC1	437	19.86	22	PNP	cm	2	9.959	4.72	7.699	12.672	8.862	8.14	1.42	1.843	-1.306	-0.694	0.821	0.171	-0.49	0	0.526	0.914	-0.158	3.753	-1.956	-0.414	0.64
Z2010446365	528906	528906:01:02_30.00	30	15.5	105	False	Active	LCH	76.9	0	0	76.6	0	76	30.5	76.9	44.4	35.9	69.2	76.2	54.7	Cc1nc(=NC(C)c2ccncc2)c2c(C)csc2[nH]1	251	12.55	20	PNP	cm, cm, fe	3	-2.722	-3.134	-3.666	-5.026	-3.063	-2.296	-0.197	0.45	-1.181	-3.33	-1.178	-0.748	-0.094	-4.131	-1.86	-1.1	-0.915	0.064	-0.801	0.098	0.879
Z89423569	528801	528801:01:02_30.00	30	15.5	85	False	Active	DNA_Synth	86.7	52.8	14.5	0	86.7	0	33.4	0	64.2	0	0	0	0	Cc1ccn2cc(C(=O)N=c3[nH]cc(C)s3)nc2c1	206	10.84	19	PNP	cm, fe	3	5.944	2.767	3.367	4.47	2.027	3.453	-2.247	0.085	-3.115	-2.916	-0.65	-1.737	-1.917	-5.327	-1.416	-0.391	0.47	0.184	-1.997	-0.595	-0.397
Z1642247682	529437	529437:01:02_30.00	30	15.9	90	False	Active	MitoStress	56.4	0	2.7	42.6	0	45.6	33.9	55.2	56.4	0	44.1	49.7	23.4	Cc1cccc2[nH]c(CNC3CCN(C(C)C)CC3)nc12	376	17.9	21	PNP	cm	2	1.52	-0.199	-0.975	0.636	0.614	0.544	0.675	0.622	-0.74	-0.685	-1.406	-0.442	1.426	-1.153	-0.355	-0.507	0.618	1.649	-0.502	0.945	-0.593
Z1470763353	529447	529447:01:02_30.00	30	15.9	103	False	Active	MitoStress	69.2	0	0	19.1	0	18.3	42.7	43.9	69.2	0	14.3	34.5	0	COc1ccc(C2CCCN2Cc2cc[nH]n2)cc1	375	19.74	19	PNP	cm	2	-0.44	-0.595	-1.279	0.229	1.775	-0.567	0.965	-0.278	-0.707	-3.323	-0.673	0.035	0.721	-3.932	-1.041	-0.484	0.562	0.325	-2.595	0.531	-0.221
Z56884254	528869	528869:01:02_30.00	30	16.2	104	False	Active	LCH	55.5	17.4	0	38.9	0	38	54.4	55.5	52.7	10.6	28.9	49.8	41.9	COC(=O)c1c(NC(=O)C2CCCO2)sc2c1CCC(C)C2	526	23.91	22	PNP	cm	2	-3.629	-2.177	-2.911	-4.761	-1.576	-3.717	-1.034	-0.15	-2.471	-4.049	0.05	0.323	-0.265	-7.96	-2.81	-0.419	-0.877	-0.572	-1.84	-0.59	1.248
Z2936908305	529036	529036:01:02_30.00	30	16.2	84	False	Active	Tubulin	67	0	0	47.2	0	45.5	51.4	63.5	51.9	14.2	35.5	67	44.5	Cc1nn(C(C)C)cc1CN=c1cc(C#N)c2ccccc2[nH]1	251	10.91	23	PNP	cm	2	-4.247	-1.798	-1.038	-3.636	-1.418	-4.032	0.185	0.626	-2.208	-1.796	-0.261	-0.954	1.294	-2.465	-0.425	0.086	-0.308	0.44	-2.244	0.098	0.24
Z354262560	529151	529151:01:02_30.00	30	16.6	91	False	Active	DNA_Synth	82.7	75.3	0	0	82.7	0	50.9	0	48.4	0	0	0	0	O=[N+]([O-])c1c[nH]c2ccc(Br)cc2c1=NCC1CCCO1	379	18.05	21	PNP	cm	2	1.689	-0.941	-1.438	2.977	1.325	4.285	-0.757	1.07	1.359	-1.061	-0.032	-0.387	-1.938	-3.018	-0.581	-0.168	-0.27	0.469	-2.214	-0.494	0.403
Z88340009	528874	528874:01:02_30.00	30	16.8	95	False	Active	HDAC	56.5	0	12.8	51.7	0	56.5	16.2	28	0	41.2	48.3	52.1	33	Cc1sc(NC(=O)c2cc3ccccc3s2)c(C#N)c1C	221	10.52	21	PNP	cm	2	-3.118	-4.547	-3.966	-2.065	-2.306	-2.138	0.314	-0.765	1.733	0.984	-0.284	-1.293	-3.171	-1.149	-1.216	0.042	-0.413	-1.568	3.826	0.207	0.123
Z1462086260	528852	528852:01:02_30.00	30	16.8	99	False	Active	HSP90	60.8	33.6	0	11.7	0	10.2	60.8	18	43.9	0	13.7	24.1	37.5	Cc1n[nH]c(C2CN(c3cc(C(C)(C)C)nc(C(C)(C)C)n3)CCO2)n1	495	19.04	26	PNP	cm, cm, cm	3	-4.723	-2.938	-3.579	-4.661	-5.262	-4.05	-3.331	-1.774	-1.17	1.296	2.356	2.589	-3.382	-0.891	1.153	2.554	-1.356	0.559	-1.855	0.346	1.05
Z56884058	528877	528877:01:02_30.00	30	16.9	99	False	Active	Tubulin	65.6	0	0	51.5	0	53.1	46.9	65.1	58.5	7.6	40.9	65.6	29.4	COC(=O)c1c(NC(=O)C2CCCO2)sc2c1CCCC2	439	20.9	21	PNP	cm	2	-3.416	0.677	-0.609	-0.605	-1.197	-3.284	0.071	0.833	-2.12	-2.423	-1.593	-0.791	1.202	-1.425	0.299	-0.461	0.682	0.171	-1.283	1.18	-0.846
Z1268663650	529238	529238:01:02_30.00	30	17.3	90	False	Active	LCH	76.2	11	0	43.8	12.6	40.8	18.2	76.2	61.2	7.9	10.2	52.7	34.1	Brc1ccc(CNCC2CCCn3ccnc32)s1	339	18.83	18	PNP	cm	2	-1.045	-1.684	-1.948	-3.685	-1.803	-0.75	-0.435	0.984	-1.887	-2.835	-0.26	0.381	1.018	-3.635	-0.09	-0.215	-2.345	-0.84	-1.768	-2.858	2.988
Z240227912	529136	529136:01:02_30.00	30	17.8	107	False	Active	HDAC	57.8	0	0	50.2	0	57.8	50.9	49.6	33	19.3	42.8	45.2	25.5	CCOC(=O)c1c(NC(=O)c2cc(C)nc3c2c(C)nn3C)sc(C)c1C	298	11.04	27	PNP	cm, cm, fe	3	-3.283	-2.547	-3.184	-2.891	-2.506	-3.6	-2.282	-0.899	-1.536	-2.714	-1.339	-0.47	-2.189	-5.135	-1.18	-0.844	-0.841	-1.541	-0.95	-0.118	0.745
Z1641031568	529168	529168:01:02_30.00	30	18.3	105	False	Active	MitoStress	58.7	0	0	13.3	0	4.7	39.1	28.3	58.7	0	2.6	29.3	0	CCc1nc(Cn2c(C(=O)OC)cc(=O)c3ccccc32)cs1	250	10.87	23	PNP	cm	2	-0.324	1	0.811	-0.038	-0.343	-1.354	1.085	-0.859	-0.133	-1.029	-0.167	-0.641	0.988	-1.55	-0.589	-0.355	-0.097	0.218	-1.914	-0.461	0.131
Z1667551794	529175	529175:01:02_30.00	30	18.5	90	False	Active	DNA_Synth	90.8	57.8	4	0	90.8	0	9.7	0	51.4	0	0	0	0	Cc1nc(=NC(=O)c2coc3ccccc23)n(C)[nH]1	206	10.84	19	PNP	cm	2	7.725	4.216	4.707	3.505	3.868	5.164	-0.631	3.596	-5.304	-1.635	-0.303	-0.771	-3.28	-3.064	0.137	0.684	0.014	2.595	-2.923	-0.604	0.45
Z441895662	528635	528635:01:02_30.00	30	18.5	85	False	Active	DNA_Synth	70.2	61.4	0	0	70.2	0	42.7	0	18	0	0	0	6.2	Cc1nn(C(C)(C)C)c2nc(C(C)C)cc(C(=O)Nc3sccc3C#N)c12	318	11.78	27	PNP	cm, cm, fe	3	1	-1.137	-2.209	1.061	1.288	2.192	2.681	3.503	4.54	4.679	-0.402	-1.165	0.484	1.825	2.876	1.128	1.242	1.819	-2.034	1.664	-1.035
Z2974957447	528742	528742:01:02_30.00	30	18.7	96	False	Active	MitoStress	76.3	0	0	20.3	10.7	15.2	30.8	38.5	76.3	0	29.8	35.8	3.8	OCc1ccnc(N2CCCC2c2cncc(Br)c2)n1	370	18.5	20	PNP	cm, cm, cm	3	1.51	1.662	0.493	0.139	0.938	1.728	0.391	-0.562	0.075	-2.832	0.554	-1.738	-1.794	-3.42	-2.801	-1.268	0.812	0.895	-1.203	1.011	-0.776
Z1232659049	529209	529209:01:02_30.00	30	18.7	94	False	Active	Tubulin	74.7	0	0	62.4	0	56.2	49.2	67	28.1	23	47.4	74.7	56.4	CCn1nc(C)c(CN=c2cc(C#N)c3ccccc3[nH]2)c1C	246	10.7	23	PNP	cm	2	-10.221	-4.015	-4.639	-5.156	-5.46	-6.704	-0.752	-0.757	-2.208	-1.231	-0.436	-0.808	-0.089	-0.31	0.264	0.743	-1.375	-0.224	-1.634	-0.382	1.531
Z1698212721	528923	528923:01:02_30.00	30	18.7	86	False	Active	MitoStress	77.7	43.8	0	0	71	0	33.2	4.7	77.7	0	1	0.6	0	Cn1c(=NC(=O)C2(C#N)CCCC2)[nH]c2c(Cl)cccc21	353	16.81	21	PNP	cm	2	1.104	2.459	1.694	0.888	1.253	0.91	0.238	2.322	0.356	-4.347	0.312	-1.226	-1.468	-6.668	-1.14	1.305	0.586	1.617	-2.052	0.075	-0.245
Z1987499413	529024	529024:01:02_30.00	30	18.8	80	False	Active	HSP90	65.2	17.9	3	16.3	17.5	15.1	65.2	29.7	31.7	3.9	11.1	64.3	29.4	CC(C)n1cnc(C(=O)NC2CC2c2cccc(Cl)c2)c1	432	20.57	21	PNP	cm	2	-1.422	-1.243	-1.91	1.293	-1.559	-1.054	-2.332	0.88	-0.392	3.851	2.005	0.967	-3.803	2.524	2.335	2.171	-0.053	2.119	-2.609	0.2	-0.063
Z2439469901	529171	529171:01:02_30.00	30	19	87	False	Active	DNA_Synth	70.7	12.6	25.1	0	70.7	0	28.8	0	52.8	0	0	12.4	0	CC(C)Cc1cc(=NC(=O)c2ccc3c(ccn3CCCN)c2)[nH][nH]1	284	11.36	25	PNP	cm	2	1.725	7.239	4.886	4.244	3.707	2.783	1.606	2.311	1.619	0.166	-0.62	0.227	2.437	0.179	0.823	2.264	-0.063	3.139	-2.522	-0.041	-0.087
Z1874197365	528767	528767:01:02_30.00	30	19	95	False	Active	MitoStress	59	0	0	46.9	0	42.2	31.3	57.7	59	3.2	29.4	58.2	21.2	CC(C)c1nc(N2CCOC(c3ccco3)C2)cc(C(C)(C)C)n1	458	19.08	24	PNP	cm, cm, cm	3	-5.078	-1.418	-1.362	-1.635	-1.941	-3.537	-1.121	-0.993	-3.323	-2.064	-1.128	-0.326	-0.296	-2.379	0.033	-1.379	-0.316	0.045	-1.559	-0.088	0.144
Z1336472328	529219	529219:01:02_30.00	30	19.7	98	False	Active	LCH	64.2	0	0	51.3	0	49.9	44.7	64.2	62.2	7.4	51	61.7	44.4	Cc1cc(C(=O)Nc2sc(C)cc2C(N)=O)c2cnn(C)c2n1	251	10.91	23	PNP	cm, cm, fe	3	-2.314	-2.22	-1.968	-1.266	-1.583	-2.443	-0.327	0.933	-3.799	-1.608	-1.312	-0.702	0.127	-1.418	-0.229	0.846	0.533	1.439	-1.259	1.412	-0.51
Z1268664530	529286	529286:01:02_30.00	30	19.9	101	False	Active	MitoStress	74.6	0	0	34.1	2.9	28.8	25.6	58.4	74.6	0.5	17.2	46.6	12.6	Cc1cn2c(n1)C(CNCc1csc(C(C)C)n1)CCC2	382	18.19	21	PNP	cm	2	-2.363	-2.22	-1.373	-0.787	-2.332	-2.065	1.526	1.196	-0.813	-2.573	-0.982	0.583	-1.835	-2.749	-1.656	-0.144	-0.601	0.143	-1.731	-0.412	0.365
Z2408231814	529027	529027:01:02_30.00	30	20.7	100	False	Active	HDAC	82	0	0	79.1	0	82	39	73.3	20.3	34.2	57.6	78.7	52.2	COCc1cc(Cl)ccc1NC(=O)c1cc(C2CC2)n(C)n1	311	14.14	22	PNP	cm	2	-3.753	-3.173	-4.251	-6.111	-2.886	-3.822	-0.778	-1.291	-2.112	-1.262	-0.983	0.064	1.268	-1.726	-1.255	-1.177	-0.503	-0.151	-1.446	0.474	0.258
Z4323477990	529383	529383:01:02_30.00	30	20.7	84	False	Active	DNA_Synth	74.1	70.3	0	0	74.1	0	41.8	0	19.4	0	0	0	14.5	C=CC(=O)N(Cc1nocc1C)C1CCCc2ccc(F)cc21	384	16.7	23	PNP	cm	2	3.003	-0.728	0.137	2.204	1.356	4.284	-1.441	-0.547	-0.604	-0.809	-0.305	-0.94	-2.245	-1.628	-0.736	-0.533	-0.212	2.031	-1.509	0.561	0.328
Z229180068	528899	528899:01:02_30.00	30	20.9	98	False	Active	MitoStress	63.4	0	0	16.2	0	10.9	42.2	41.1	63.4	0	7.6	38.5	0	COCCCNC(=O)CN(C)c1nc(-c2cccs2)nc2sc3c(c12)CCC3	366	13.07	28	PNP	cm, cm, fe	3	-0.715	0.222	1.352	-0.229	0.516	-0.463	1.491	1.52	0.501	-1.367	-0.922	-0.795	0.696	-3.851	-1.223	-2.199	0.205	-0.755	-2.858	0.43	0.17
Z1590666321	528967	528967:01:02_30.00	30	21.1	98	False	Active	LCH	80.8	0	0	44.8	0	52.8	39.6	80.8	38.2	3.5	23.4	47.8	31.4	CC1(C)CN(CC(F)(F)F)CCN1c1nc2ccccn2c(=O)c1[N+](=O)[O-]	487	18.04	27	PNP	cm, cm, fe	3	0.536	-1.196	-1.304	1.793	1.258	1.525	-1.015	0	-2.276	-3.059	-2.757	-0.224	-1.747	-4.942	-1.476	-2.229	0.713	-0.484	-1.562	0.288	-0.689
Z1934778220	529366	529366:01:02_30.00	30	21.1	96	False	Active	Tubulin	75.9	0	0	69.2	0	71.3	47	59.1	22.2	31.6	68	75.9	53.3	CC1(C)CN(C(=O)c2csc(-c3cc(Br)cs3)n2)CC1O	440	20.95	21	PNP	cm, cm	3	-5.306	-2.406	-2.702	-5.413	-3.296	-5.309	-0.339	2.166	-0.699	0.113	-0.856	-0.58	0.961	-0.323	-0.06	-0.266	0.085	-1.261	-1.135	1.352	0.345
Z1280184773	528932	528932:01:02_30.00	30	21.8	82	False	Active	DNA_Synth	86.4	32.6	36	0	86.4	0	16.7	0	28.4	0	0	0	0	CC(C)c1cc(=NC(=O)C2Cc3ccccc3O2)[nH][nH]1	337	16.85	20	PNP	cm	2	11.078	9.67	8.558	7.762	9.543	6.868	-1.222	0.217	2.647	5.685	3.268	3.033	-3.918	4.029	2.868	3.305	0.383	2.513	-1.56	0.426	-0.812
Z1983676530	529471	529471:01:02_30.00	30	21.9	102	False	Active	HDAC	67.5	0	0	61.5	0	67.5	50.5	50.2	0	39.8	43.3	66.4	54.4	Cc1cc(C(F)(F)F)nc(N2CCCC2C2CCCCC2O)n1	669	29.09	23	PNP	cm, cm, cm	3	-4.735	-3.173	-4.507	-7.021	-4.09	-5.192	3.398	-0.78	-4.352	-1.367	-0.068	-0.602	1.645	3.135	0	1.339	-0.534	-1.304	0.066	-0.018	0.187
Z4874713536	528956	528956:01:02_30.00	30	22.6	104	False	Active	MitoStress	82.2	26.8	0	0.2	27.3	0	36.7	29.5	82.2	0	5.6	14.5	0	CCN1CC(CC(C)C)N=C1NCc1ccc2cc(O)ccc2c1	422	17.58	24	PNP	cm	2	-1.124	-2.285	-2.287	-2.272	-1.599	-0.852	-0.949	-0.817	-1.241	-8.189	-0.99	-0.68	-4.067	-13.063	-3.514	-0.887	-0.375	-0.839	-3.568	-0.845	0.336
Z1268663970	529302	529302:01:02_30.00	30	23	99	False	Active	LCH	85.1	2.5	0	60.9	0	54.4	9	85.1	60.4	14.3	32.3	60	42.9	CC(C)(C)c1nc(CNCC2CCCn3ccnc32)cs1	393	18.71	21	PNP	cm	2	-2.508	-3.958	-3.798	-3.028	-3.889	-1.739	-1.762	0.452	-0.761	-4.786	-1.351	-0.554	-0.156	-6.434	-1.72	-2.666	-0.751	0.603	-0.477	-1.099	0.756
Z649071304	529227	529227:01:02_30.00	30	23.3	92	False	Active	BET	76.8	0	0	76.8	0	73.1	37.8	73	16.9	37.3	55.8	74.7	65	N#CC1(NC(=O)c2sc3cc(C(F)(F)F)ccc3c2Cl)CCCC1	407	16.96	24	PNP	cm	2	-8.974	-6.015	-6.015	-5.784	-6.649	-6.087	-1.933	-0.47	-1.321	-0.372	0.262	-0.743	0.295	-2.654	0.363	-1.216	0.298	-0.942	-1.781	1.055	-0.229
Z2370536689	529011	529011:01:02_30.00	30	23.8	94	False	Active	Tubulin	57	0	0	49	0	53.3	44.5	56.2	47.7	13.8	42.9	57	50.3	Cc1cc(CN=c2[nH]c(C)nc3scc(C)c23)cc(C)n1	232	11.05	21	PNP	cm, cm, fe	3	-2.686	-6.07	-5.678	-3.246	-4.141	-0.885	1.026	2.408	0.281	0.274	-0.8	0	0.464	0.241	1.316	1.935	0.126	0.46	-1.385	0.481	-0.032
Z4607589947	528814	528814:01:02_30.00	30	23.8	89	False	Active	LCH	69.5	14.5	0	43.6	11.3	33.3	29.3	69.5	50	0	26.6	61.3	47.5	CNS(=O)(=O)c1ccc(C(=O)N=c2[nH][nH]c3c(Br)cc(C)cc23)o1	283	11.79	24	PNP	cm	2	-4.57	-2.406	-3.041	-4.22	-0.646	-5.065	-0.334	-0.4	-5.091	-1.22	-1.479	-0.992	0.084	-2.125	-0.759	-1.354	-0.413	0.504	-2.603	-0.338	1.013
Z104378286	528900	528900:01:02_30.00	30	24	100	False	Active	Tubulin	67.4	0	18.3	56.3	0	58.6	24.2	33	0	44.2	53.8	67.4	33.8	CCOC(=O)c1sc(-c2ccc(-c3ccccc3)cc2)cc1N	241	10.48	23	PNP	cm	2	-4.961	-2.764	-3.117	-2.914	-3.408	-4.497	2.264	1.981	4.923	2.826	1.096	2.225	-0.482	1.112	1.091	2.838	-0.147	0.696	1.176	0.581	0.177
Z1974526839	529010	529010:01:02_30.00	30	24.5	94	False	Active	HDAC	80	0	0	76.3	0	80	47.4	78	22.8	39.8	60.5	77.7	57.1	CC(C)Cn1cc(C(=O)NC2CC2c2cccc(Cl)c2)cn1	444	20.18	22	PNP	cm	2	-4.006	-3.294	-2.622	-3.02	-2.767	-4.088	1.07	1.592	0.178	-1.831	-1.264	-1.25	1.091	0.144	-0.254	-1.822	-0.365	-0.63	-0.476	0.607	0.143
Z1552687391	529390	529390:01:02_30.00	30	24.7	69	False	Active	Tubulin	59.9	4.5	0	43.7	0	45.1	57.8	50.3	25.1	7.5	57.6	59.9	49.7	C=CC(=O)Nc1cc(NC(=O)c2cnn(C(C)C)c2C2CC2)ccc1F	352	13.54	26	PNP	cm	2	-5.627	-3.174	-3.637	-3.554	-3.232	-5.677	-0.048	1.333	-5.835	-1.598	-0.438	-1.537	-0.365	-1.336	-0.962	1.111	-0.898	1.604	-0.75	0.942	0.76
Z2271720673	528997	528997:01:02_30.00	30	24.9	101	False	Active	DNA_Synth	31.4	24.3	0.6	0	31.4	0	0	0	0	3.6	0	0	8.3	Cc1cnn(C2CCCN(c3nccc(C#N)n3)C2)c1	376	18.8	20	PNP	cm, cm, cm	3	0.179	0.811	1.072	0.72	1.615	1.495	-0.862	0.401	-1.199	4.564	0.543	0.324	-2.624	6.805	1.536	0.94	-0.521	0.278	4.139	-0.624	0.632
Z1546890795	529065	529065:01:02_30.00	30	25.6	86	False	Active	MitoStress	64.3	0	0	35	0	27.7	28.8	45.1	64.3	19.6	17.9	63.6	9	Cc1ccc(C2CN(c3ncc(C)c(C)n3)CCO2)o1	387	19.35	20	PNP	cm, cm, cm	3	-2.882	2.584	3.05	-0.449	1.863	-5.382	4.402	0.791	0.214	-1.935	0.628	-0.644	0.992	-1.461	-0.916	2.183	0.336	1.702	-1.709	0.236	-0.497
Z1272424781	528948	528948:01:02_30.00	30	25.7	90	False	Active	MitoStress	88.2	21.9	0	3	45.8	0	36.7	33.5	88.2	0	12.2	26.9	0	Cc1cccc2c(=NCc3ccn(C(C)C)n3)c(C#N)c[nH]c12	251	10.91	23	PNP	cm	2	0.794	0.468	1.1	0.424	0.899	0.972	2.126	2.597	2.214	-9.401	0.079	-0.713	-10.502	-12.022	-4.804	-0.725	1.145	1.471	-2.747	0.84	-0.799
Z1687507311	529325	529325:01:02_30.00	30	25.7	107	False	Active	MitoStress	51.9	0	0	39.1	0	42.5	51.1	48	51.9	0.7	36.8	48.6	23.2	CCOc1cccc(N2CCC(Cc3cnn(C)c3)C2)c1[N+](=O)[O-]	414	17.25	24	PNP	cm	2	-3.173	-2.519	-3.387	-1.768	-1.84	-3.963	-1.391	-0.114	-2.811	0.401	-2.367	-1.178	-1.448	-3.175	0.727	-1.712	-0.18	-0.267	-2.244	0.261	-0.205
Z2711802286	528908	528908:01:02_30.00	30	26.3	98	False	Active	LCH	81.9	0	0	77.2	0	78.2	36.5	81.9	31.8	37.6	52.1	74.6	56.5	CCOC(C(=O)N=c1[nH]c(-c2ccc3c(c2)CCC(=O)N3)c(C)s1)C(C)C	395	14.63	27	PNP	cm	2	-6.913	-4.015	-5	-3.975	-6.617	-4.587	-0.287	-0.545	-3.059	-6.188	-1.83	-1.458	-0.558	-6.317	-2.073	-1.939	-0.498	-0.765	-0.835	0.222	0.651
Z1833927862	528654	528654:01:02_30.00	30	27.5	90	False	Active	LCH	76.2	0	0	73.8	0	73.8	52.8	76.2	15.7	30.3	59.8	75.6	66	Cc1ncsc1C(=O)N=c1[nH][nH]c2ccc(C(F)(F)F)cc12	260	11.82	22	PNP	cm	2	-8.014	-3.173	-5.042	-9.051	-4.607	-6.447	-0.823	-0.92	-5.341	-2.195	-0.781	-0.405	0.962	-2.789	0.444	-1.078	-1.324	0.335	-2.212	0.362	1.649
Z829334752	528813	528813:01:02_30.00	30	27.8	82	False	Active	DNA_Synth	70.6	39.8	17.4	0	70.6	0	30.6	0	35.6	0	0	0	0	CC(C)c1cc(=NC(=O)c2cc3ccccc3n2C)[nH][nH]1	236	11.24	21	PNP	cm	2	2.359	1.75	0.634	4.836	4.889	2.386	0.87	1.034	2.313	1.223	-2.701	-1.397	1.053	-1.731	0.362	-4.202	-0.201	0.681	-2.455	-1.144	0.308
Z1548464734	528841	528841:01:02_30.00	30	28	82	False	Active	DNA_Synth	85.1	59.1	0	0	85.1	0	30.6	0	76	0	0	0	0	CCn1c(=NC(=O)c2cscn2)[nH]c2cc(C#N)ccc21	220	10.48	21	PNP	cm	2	3.56	1.687	3.895	3.484	4.061	3.078	1.071	3.865	-4.433	-8.899	0.528	-0.84	-14.362	-17.281	-5.508	0.72	-0.145	3.061	-3.07	-0.282	0.626
Z90505968	528896	528896:01:02_30.00	30	28.5	89	False	Active	LCH	67.8	0	0	49.2	0	50.3	31.4	67.8	63.6	11.5	33.9	57.7	30.4	OCCCNCc1cn(-c2ccccc2)nc1-c1cccnc1	249	10.83	23	PNP	cm	2	-2.765	-2.628	-2.024	-1.368	-2.666	-0.82	-0.851	0.853	-2.803	-2.299	-0.375	0.197	1.033	-1.954	0.312	-1.801	-0.183	0.832	-1.57	-0.173	0.18
Z1795984189	528652	528652:01:02_30.00	30	30.7	77	False	Active	Tubulin	84.9	3.8	0	58.6	0	48.5	27.5	61	25.4	29.5	48.3	84.9	66.6	CCOC(=O)C1CCCN(c2cncc(-n3ccnc3C)n2)C1	414	18	23	PNP	cm, cm, cm	3	-11.382	-9.314	-8.584	-8.232	-9.038	-9.137	5.215	3.377	0.674	0.945	0.952	-1.608	1.231	2.361	1.067	2.965	1.443	4.251	-0.743	0.877	-1.09
Z1566227021	529388	529388:01:02_30.00	30	31.3	77	False	Active	HSP90	57.5	19.9	0	36.5	0	34.8	57.5	48.7	31.8	0	47.9	53.7	53	C=CC(=O)Nc1cc(NC(=O)c2cnn(CC(C)C)c2C2CC2)ccc1F	364	13.48	27	PNP	cm	2	-7	-8.107	-5.054	-5.103	-5.019	-6.303	-0.535	-0.197	-5.248	-1.313	-1.574	-2.058	-0.916	-0.572	-0.746	0.526	-0.683	1.637	-0.957	0.55	0.466
Z1272289929	529224	529224:01:02_30.00	30	31.3	92	False	Active	Tubulin	64.6	5.5	0	32.4	29.3	28.2	23	54.9	61.9	0.3	30.8	64.6	30.2	COc1ccc(CN=c2cc[nH]c3ccsc23)cc1NC(C)=O	242	10.52	23	PNP	fe	2	-0.412	-0.595	0.167	-0.882	-0.564	-0.449	2.429	1.167	-1.29	-2.076	-0.911	0.11	0.913	-0.886	-0.386	0.757	0.147	3.613	-2.636	0.516	-0.174
Z3584044187	528631	528631:01:02_30.00	30	33.3	99	False	Active	LCH	73	0	0	64.8	0	65	30.2	73	41.8	18.7	46.4	65.6	44.9	CN(C)C1CCCC1NC(=O)c1sc2ccccc2c1Cl	464	22.1	21	PNP	cm	2	-5.333	-3.721	-3.751	-4.281	-3.627	-3.963	-0.424	-0.885	-4.808	-1.91	-1.359	-0.666	1.759	-1.307	-0.902	-4.023	-0.454	-0.203	-1.496	-0.366	0.656
Z966099900	528700	528700:01:02_30.00	30	33.7	86	False	Active	Tubulin	81.2	0	0	72.6	0	70.7	42	66.8	0	37.7	68.4	81.2	66.1	CC(C)Cn1ncc2cc(C(=O)N=c3[nH]c(C(F)(F)F)cs3)cnc21	302	12.08	25	PNP	cm, fe	3	-11.808	-8.1	-12.045	-13.653	-10.076	-10.129	1.939	3.006	-3.144	0.188	-1.396	-0.348	2.126	3.498	2.47	0.181	0.451	2.035	-1.551	1.232	-0.125
Z1618216379	528739	528739:01:02_30.00	30	34.9	95	False	Active	HDAC	79.3	0	0	75.6	0	79.3	46.1	72.1	28.2	35	56.3	76	57.3	Cc1ccc(Cl)c2ccc(=NCC3(CCO)CCOC3)[nH]c12	471	21.41	22	PNP	cm	2	-6.463	-4.204	-4.057	-5.801	-6.691	-4.816	-0.642	-0.091	-1.914	-0.48	-0.47	-0.795	2.231	-1.157	1.198	-0.44	0.054	-0.543	-1.992	0.4	0
Z1874229457	528921	528921:01:02_30.00	30	35.2	75	False	Active	MitoStress	76.6	0.8	0	39.1	0	35.1	38.3	54.3	76.6	9.9	40.4	59.9	34.7	N=c1[nH]cnc(N2CCc3cccc(F)c3C2)c1Cl	272	14.32	19	PNP	cm	2	-6.059	-2.628	-3.397	-2.424	-0.69	-5.791	3.019	2.115	-1.979	-3.78	0.015	-0.668	-0.638	-2.54	-1.977	2.086	0.009	2.884	-2.612	0.958	0.064
Z573246462	528971	528971:01:02_30.00	30	36.1	98	False	Active	MitoStress	60.9	0	36.1	34.5	0	39.7	18.6	47.7	60.9	19	28.2	55.8	0	CCNC(=O)CN(C)c1nc(-c2cccs2)nc2sc3c(c12)CCC3	330	13.2	25	PNP	cm, cm, fe	3	2.558	4.427	4.634	2.067	3.969	2.254	3.53	2.715	2.929	-1.103	-0.331	0.516	1.186	2.636	-1.419	0.763	2.475	1.559	-1.441	1.978	-2.536
Z1458474986	529415	529415:01:02_30.00	30	36.4	99	False	Active	LCH	92.1	0	0	70.9	0	68.7	19.4	92.1	49.8	27.2	45.9	65.2	44.5	CC1CCN(C(=O)C2CCC(N)C2)c2ccccc21	574	30.21	19	PNP	cm	2	-3.821	-3.173	-3.715	-7.065	-5.008	-3.175	-1.974	-0.561	-4.167	-7.006	-2.633	-0.845	-2.39	-10.594	-3.299	-3.926	-0.67	-1.475	-0.381	-0.227	0.805
Z1815872013	529075	529075:01:02_30.00	30	36.8	88	False	Active	LCH	77.8	2	0	54.6	0	51.5	33	77.8	63.2	6.2	36.4	65.3	46.4	CC(C)CCn1ccc(=NCc2nc(-c3cnn(C)c3)cs2)[nH]1	260	11.3	23	PNP	cm, cm	3	-4.222	-2.198	-3.888	-4.918	-4.811	-5.009	0.135	3.368	1.397	-3.453	-1.101	-0.375	1.068	-4.276	0.161	-1.348	-0.169	1.265	-2.992	-0.544	0.433
Z195572394	528705	528705:01:02_30.00	30	37	97	False	Active	LCH	75.8	0	0	56.6	0	59.3	38.4	75.8	54.2	18.3	34	57.4	29.9	CCOC(=O)c1sc2[nH]c(CN3CCCCC3C)nc(=N)c2c1C	453	18.88	24	PNP	cm, cm, fe	3	-2.914	-1.589	-2.709	-4.104	-3.08	-2.659	-0.408	-0.457	-3.945	-7.45	-1.767	-0.4	-2.224	-9.573	-3.344	-2.226	-0.394	-1.125	-1.463	-0.45	0.465
Z872213700	528904	528904:01:02_30.00	30	37	94	False	Active	MitoStress	78.8	59.2	0	0	66.4	0	47.6	17.5	78.8	0	0	0	0	COCc1nc(C(=O)N=c2[nH]c3ccccc3n2C(C)(C)C)cs1	284	11.83	24	PNP	cm	2	-1.684	-0.954	-0.418	-0.345	-0.658	-0.553	-3.146	0.619	-4.545	-7.97	-0.603	-0.442	-10.791	-13.484	-2.16	-0.973	-0.656	0.696	-2.814	-0.655	1.005
Z1642870012	528828	528828:01:02_30.00	30	40.8	75	False	Active	MitoStress	86.8	49.2	0	0	86.5	0	13.4	7.7	86.8	0	0	0	0	Cc1cc(Br)c2oc(C(=O)N=c3[nH]cnn3C)cc2c1	219	10.95	20	PNP	cm	2	11.148	5.175	9.008	13.704	9.536	10.311	-3.808	2.339	-11.443	-21.266	-0.751	-0.983	-45.943	-47.299	-12.34	0.016	-2.57	7.028	-6.917	-0.783	3.368
Z443014958	529148	529148:01:02_30.00	30	43.2	82	False	Active	Tubulin	78.3	0	8.2	66.4	0	65.4	19.8	65.7	26.6	32.8	64.4	78.3	47.2	O=C(N=c1[nH]c2cc(Cl)ccc2s1)c1sccc1Br	206	10.84	19	PNP	cm	2	-1.708	-1.589	-3.914	-2.208	-0.996	-2.239	2.885	1.437	0.341	0.364	-1.153	-0.954	-2.455	4.539	1.455	0.26	-0.101	3.632	-2.261	1.703	-0.188
Z216478460	528939	528939:01:02_30.00	30	47	70	False	Active	Tubulin	91	0	0	72.7	0	67.5	40	69.2	33.1	40	61.2	91	67.3	N#Cc1ccsc1NC(=O)C1CC1c1ccccc1C(F)(F)F	458	19.91	23	PNP	cm	2	-8.756	-6.573	-6.865	-10.432	-9.593	-11.154	3.355	1.885	-1.097	-1.971	-0.286	-0.932	0.841	3.524	1.591	1.981	-0.071	4.203	-3.377	0.961	0.32
Z2440388168	528782	528782:01:02_30.00	30	47.2	90	False	Active	LCH	88.6	0	0	56.6	0	53.3	27.7	88.6	58.4	1.2	32.1	60.5	41.1	NCC1CCCC1NC(=O)c1[nH]nc2ccc(Br)cc12	446	22.3	20	PNP	cm	2	-3.821	-2.177	-1.708	-4.862	-3.132	-3.966	-3.32	-1.483	-8.31	-5.186	-4.217	-0.916	1.983	-7.264	-1.595	-4.797	0.889	1.359	-3.432	0.304	-1
Z319100322	528673	528673:01:02_30.00	30	47.8	102	False	Active	LCH	93.5	0	0	65.5	0	65.5	23.9	93.5	50.3	17.6	32	63.1	41	Cc1sc2[nH]c(CN3CCC(C)CC3)nc(=NCCCNS(C)(=O)=O)c2c1C	468	16.71	28	PNP	cm, cm, fe	3	-6.446	-3.358	-4.303	-5.023	-6.916	-4.026	-1.561	-0.429	-7.348	-7.72	-5.994	-1.804	0.265	-8.473	-2.289	-6.839	-0.189	-1.122	-1.824	-0.438	0.014
Z2445066501	529061	529061:01:02_30.00	30	48.5	104	False	Active	LCH	93.1	0	0	70.5	0	69.4	9.8	93.1	38.5	29	39.1	68.5	39.4	CC1(CN)CCN(Cc2cccc(-n3cccn3)c2)C1	466	23.3	20	PNP	cm	2	-2.749	-1.684	0.089	-4.207	-1.863	-2.175	3.537	-0.443	-6.482	-7.474	-5.507	-1.213	4.438	1.727	-1.1	-3.853	-0.364	-0.464	-0.713	0.19	0.236
Z1578913905	529402	529402:01:02_30.00	30	48.7	85	False	Active	MitoStress	96.7	25.3	0	1.6	44.8	0	29.4	30	96.7	0	9	21	0	CCC1CCC(C)N1c1cc(C)nc(-c2ccccn2)n1	457	21.76	21	PNP	cm, cm, cm	3	-3.848	-1.78	-1.686	-4.72	-4.319	-2.715	-0.831	1.556	-10.844	-44.919	-2.022	-4.433	-87.853	-75.288	-30.391	-1.112	-2.139	2.237	-7.435	-1.052	2.73
Z1489335802	528710	528710:01:02_30.00	30	48.9	91	False	Active	LCH	77.1	0	8.3	63.2	0	63.9	0	77.1	26.3	28	57.4	64.9	25.3	Cc1[nH]nc(C(=O)N=c2sc3ccccc3n2C)c1O	218	10.9	20	PNP	cm	2	0.705	0.932	0.392	0.988	-0.19	1.725	2.765	3.9	-1.234	-2.874	-4.436	-1.631	-0.321	-3.625	1.198	0.213	0.863	1.814	-2.078	0.488	-0.64
Z86339633	529125	529125:01:02_30.00	30	50.3	73	False	Active	Tubulin	94.6	0	0	75.9	0	71.4	26.8	69.1	23	52.9	60	94.6	55.7	CN(Cc1cccs1)c1nc(C(F)(F)F)nc2ccccc12	260	11.82	22	PNP	cm	2	-10.063	-4.181	-3.897	-9.569	-7.39	-12.721	4.465	2.675	0.878	0.226	0.856	-0.632	2.743	4.868	1.462	1.957	-0.731	3.909	-2.647	0.55	0.705
Z2826956728	529002	529002:01:02_30.00	30	52.2	86	False	Active	LCH	82.1	0	0	73.6	0	72.3	40	82.1	53.2	34.7	57.4	73.8	64.5	CC(C)C1CC(NC(=O)c2csc(CCN)n2)c2ccccc21	456	19.83	23	PNP	cm	2	-7.283	-7.308	-9.855	-9.597	-10.649	-7.821	0.126	0.258	-5.821	-8.277	-0.783	-1.02	0.316	-8.781	-2.299	-0.416	-1.275	0.992	-2.032	-0.101	1.508
Z1348251657	529218	529218:01:02_30.00	30	55.6	91	False	Active	Tubulin	88.1	0	0	64.4	0	53.6	23.5	69.6	39.7	31.9	49.1	88.1	53.7	Cc1cc(CSc2nnc(CCC(N)=O)n2C)c2ccccc2n1	266	11.08	24	PNP	cm	2	-14.082	-7.284	-9.259	-17.602	-11.99	-13.65	5.716	2.291	-0.06	-2.615	-1.442	-0.491	0.687	2.462	-0.547	1.146	0.616	5.342	-3.115	0.543	-0.6
Z989410894	529258	529258:01:02_30.00	30	56.5	85	False	Active	BET	77.7	0	0	77.7	0	72.6	42.5	66.7	10.8	39	66.1	77.1	71.3	O=[N+]([O-])c1cc(C(F)(F)F)c(Cl)cc1N1CCC(c2ccnn2CCO)CC1	443	15.82	28	PNP	cm	2	-19.255	-18.311	-16.171	-15.275	-15.075	-19.03	-1.148	2.874	-5.003	-1.408	0.37	-3.185	1.3	-1.333	2.021	-0.589	-1.001	0.668	-2.183	0.778	1.34
Z5177345660	529394	529394:01:02_30.00	30	58	94	False	Active	Tubulin	83.1	0	0	82.4	0	76.6	5.8	75.1	13.7	47.8	68.1	83.1	53.1	NC(=O)CNC(=O)c1[nH]ncc1NC(=O)c1ccc(Br)c2c[nH]nc12	265	10.6	25	PNP	cm	2	-10.076	-6.117	-5.929	-9.336	-7.587	-13.226	2.787	2.385	-1.855	-3.857	-0.96	-0.811	5.196	2.395	0.48	0.42	1.317	1.427	-0.313	2.449	-1.256
Z4214495965	529380	529380:01:02_30.00	30	67.9	97	False	Active	LCH	93.3	0	0	83.4	0	81.8	14.4	93.3	32.1	40.5	59.6	78.2	51.7	NCC1(O)CC(C(=O)NC2CC(c3cccc(C(F)(F)F)c3)C2)C1	783	32.62	24	PNP	cm	2	-6.076	-3.294	-2.921	-5.589	-4.722	-8.379	-1.348	-1.454	-5.4	-6.159	-2.06	-1.42	1.56	-3.876	-1.102	-2.06	-0.047	-0.221	-1.407	1.02	-0.135
Z30259505	528871	528871:01:02_30.00	30	67.9	102	False	Active	LCH	95.5	0	0	76.3	0	74.9	7.9	95.5	39.6	31.1	42.2	69.1	42.3	Cc1nn(CC(C)C)c2sc(C(=O)NC3CC(C)(C)NC(C)(C)C3)cc12	520	20	26	PNP	cm, fe	3	-8.351	-6.788	-6.657	-7.55	-9.161	-7.248	-4.492	-0.782	-9.463	-8.965	-7.035	-1.61	-0.045	-10.218	-1.997	-8.289	-1.127	-1.705	-1.507	-1.536	0.958
Z1002253800	529092	529092:01:02_30.00	30	70.6	69	False	Active	Tubulin	91.8	0	0	82.1	0	79.3	28.5	81.9	26.3	53.2	59.3	91.8	57.2	O=S(=O)(c1ccccc1N1CCC(c2cc[nH]n2)CC1)C(F)(F)F	413	17.21	24	PNP	cm	2	-13.568	-9.079	-10.97	-14.889	-12.157	-17.001	4.02	2.342	0.044	-1.208	0.334	0.323	2.866	2.717	1.765	2.051	-0.162	3.069	-3.475	-0.393	0.439
Z4909999930	528823	528823:01:02_30.00	30	74.8	68	False	Active	Tubulin	92.4	0	0	80.7	0	81.6	34.2	74.3	12.3	57.3	65.8	92.4	52.2	CC(C)c1ccc2c(c1)CN(c1[nH]cnc(=N)c1Cl)CC2	302	14.38	21	PNP	cm	2	-11.553	-4.729	-6.423	-10.805	-7.8	-11.196	5.704	6.58	2.112	0.236	1.199	0.145	2.179	4.851	3.722	4.001	0.135	1.817	-2.265	0.939	0.713
Z2755057603	528915	528915:01:02_30.00	30	76	53	False	Active	Tubulin	83.1	0	45.1	60.2	0	68.8	29.4	52.8	7.3	52.3	59.4	83.1	22.3	Cn1cc([N+](=O)[O-])c(C(=O)N2CCCc3c(Br)cc(Cl)cc32)n1	317	13.78	23	PNP	cm	2	2.4	7.854	13.203	7.505	10.766	-0.687	9.306	5.197	4.588	2.456	1.29	-0.361	4.407	9.256	2.913	4.214	1.183	2.508	-1.168	4.801	-1.226
Z238767262	528990	528990:01:02_30.00	30	76.7	79	False	Active	Tubulin	81	0	0	77.4	0	78	44.2	74	27.2	41.7	58.2	81	57.1	CCOC(=O)c1[nH]c(C)c(-c2csc(=Nc3ccccn3)[nH]2)c1C	255	10.62	24	PNP	cm, cm	3	-28.608	-25.86	-23.98	-22.143	-22.561	-25.574	1.402	5.59	-4.538	-2.333	-1.586	-1.108	-0.602	-3.513	3.829	-0.432	-1.359	-0.497	-2.995	-1.39	1.87
Z1188030578	529277	529277:01:02_30.00	30	83.8	50	False	Active	Tubulin	88.4	0	13.5	79.6	0	81.9	27.8	71	13.5	56.9	64.7	88.4	43.6	CC(Nc1ccc2scnc2c1)c1cccc(Cl)c1	238	12.53	19	PNP	fe	2	-9.313	-4.307	-0.734	-13.458	-7.103	-12.062	6.774	7.813	0.637	1.544	1.59	0.411	4.575	8.747	5.486	4.976	0.085	0.826	-2.17	1.645	0.16
Z2093329687	529335	529335:01:02_30.00	30	88.8	52	False	Active	Tubulin	86.1	0	0	84.2	0	85.7	19.1	81.8	31.3	55.8	65.5	86.1	48.1	CCOc1cc2[nH]ccc(=NCc3cc(C)nn3C)c2cc1OCC	272	10.88	25	PNP	cm	2	-11.981	-6.848	-6.867	-14.112	-11.356	-18.446	6.918	6.454	-2.702	-11.375	-4.742	-1.306	1.758	5.243	1.353	1.651	0.263	2.124	-3.045	-0.328	-0.276
[truncated: 560 more columns]
