# Supplementary material for: Identification of readily available pseudo-natural products
Source: RSC Med Chem. 2024 Jul 4;15(8):2709–17. doi: 10.1039/d4md00310a (PMC11324060; doi:10.1039/d4md00310a)
Supplement: MD-015-D4MD00310A-s002 [file MD-015-D4MD00310A-s002.xlsx]

## Sheet: Sheet1
PNG_Image	Enamine_Id	Conc_uM	Induction	Rel_Cell_Count	Cluster	Cluster_AKT_PI3K_MTOR	Cluster_Aurora	Cluster_BET	Cluster_DNA_Synth	Cluster_HDAC	Cluster_HSP90	Cluster_LCH	Cluster_MitoStress	Cluster_Na_K-ATPase	Cluster_Protein_Synth	Cluster_Tubulin	Cluster_Uncoupler
	Z2445066501	10	20.6	98	LCH	0	0	75.7	0	80	12.6	87.8	15.5	47.8	51.8	69.5	42.9
	Z2073445831	10	7.4	100	not assigned	53.5	0	0	67.5	0	10	3.9	27.4	0	2.8	0	10.8
	Z30259505	10	38.2	100	LCH	0	0	69.4	0	73.1	8.6	84.5	31.9	37.2	32.3	62.8	18.9
	Z1002253800	10	20.2	83	Tubulin	0	0	55	0	53.6	30.1	68	24.9	34.3	31	80.7	50.9
	Z1642870012	10	37.8	94	MitoStress	55	0	0	79.6	0	22.1	0	80	0	0	0	0
	Z4735130732	10	35.9	97	LCH	0	0	76.3	0	80.9	41.5	84.7	29.2	35.1	58	76.1	50.2
	Z4324040989	10	5.4	98	not assigned	0	20.3	48.7	0	57.2	0	42.6	0	44.4	35.3	40.7	8.7
	Z56884058	10	23.5	94	not assigned	0	0	52.9	0	56.3	30.7	69.8	57.4	18.6	37.5	59.9	28.7
	Z56884254	10	8.8	95	not assigned	12.1	0	13.6	0	20.9	56.6	37.6	56.2	0	24	22.9	12.4
	Z319100322	10	6	103	not assigned	0	0	55.5	0	53.1	15.5	64	40.8	31.2	27.4	45.1	20.8
	Z216478460	10	27.6	78	Tubulin	0	1.1	64.1	0	64.4	40.1	70	36.9	40.5	47.7	87.4	53.2
	Z966099900	10	20	95	not assigned	0	0	73.8	0	76.6	52.1	67.3	0	38	56.5	74.9	61.9
	Z1232659049	10	9	95	not assigned	0	0	69.8	0	74	34.3	77.3	46.4	35.8	57.8	72.9	47.6
	Z1566227021	10	6.9	99	not assigned	0	0	48.3	0	52.9	39.8	49.6	0	13.2	60.9	51.6	43.8
	Z1578913905	10	35.1	91	MitoStress	36.4	0	0	62.9	0	22.1	21.9	90.5	0	6.9	1	0
	Z195572394	10	17.8	98	not assigned	0	0	51.2	0	47.1	25.2	65.6	67.9	16.9	31.2	61	18.2
	Z238767262	10	18.5	90	Tubulin	0	0	78	0	77.7	48.2	77.6	15.4	39.8	55.7	80.6	64
	Z1626149215	10	7.1	98	not assigned	0	4.3	59.1	0	65.9	0	41.9	0	46.5	39.5	43.9	35.8
	Z1983676530	10	5.4	97	not assigned	0	0	46.6	0	63.8	24.3	25.6	0	45.5	24.3	38.6	36.1
	Z2252066711	10	9	93	DNA_Synth	41.7	20	0	89.3	0	5.8	0	41.6	0	0	0	0
	Z1987499413	10	26.8	95	not assigned	74.1	0	0	77.9	0	27.5	0	12.7	0	0	0	0
	Z1833927862	10	11.4	102	not assigned	0	0	59.8	0	64.3	37.2	71.7	10	17	25.7	56.8	33.5
	Z1266823409	10	83.6	54	Tubulin	0	17	72.9	0	77.3	30.5	71.4	32.6	55	63.1	86	39.8
	Z5177345660	10	36.1	105	not assigned	0	8.8	70.4	0	64.8	11.1	64.9	26.6	34.6	66	79	46.5
	Z1529189039	10	5.2	107	not assigned	0	0	24.5	0	21	0	26.7	5.2	18.4	10.5	1.5	4.5
	Z147142110	10	6.4	102	not assigned	0	0	48.4	0	43.9	6.4	69.7	4.3	7.1	5.5	36.6	23.9
	Z1280184773	10	8.5	88	DNA_Synth	36.3	32.5	0	85.2	0	7.9	0	21.6	0	0	0	0
	Z1795984189	10	7.8	84	not assigned	0	0	34.2	9.1	35.1	13.9	38.5	11.7	20	44.5	56.6	37.4
	Z1188030578	10	76.3	60	Tubulin	0	7.2	77.6	0	82.4	35.5	74.2	18.7	56.5	63.6	90.8	47.4
	Z1546890795	10	6.4	89	not assigned	0	6.1	21.7	0	20.5	25.4	28.6	47.6	16.1	35.7	36.2	2.7
	Z989410894	10	18.5	100	not assigned	0	0	68.9	0	68.6	27.5	61.3	8.8	43.2	58.1	72.6	60.5
	Z2093329687	10	66.1	73	Tubulin	0	0	68.3	0	68.9	37.1	74.5	43.9	43.7	49.8	89.8	46.5
	Z1348251657	10	10.7	97	not assigned	63	0	0	52.4	0	0	0.4	38	0	0	0	8.1
	Z2755057603	10	30.6	89	Tubulin	0	5.6	71.6	0	71.6	32.6	66.3	1.7	40.9	59.4	83.2	53
	Z829334752	10	16.2	84	not assigned	44	24.3	0	78.3	0	31.3	0	49.1	0	0	0	0
	Z2826956728	10	13.1	93	not assigned	0	0	60.7	0	57.9	26	69.4	59.4	35.8	49.3	66.1	44.8
	Z1336472328	10	7.1	101	not assigned	23.9	0	38.6	0	37.3	27.7	67.7	35.2	0	0	39.4	31.1
	Z4909999930	10	36.8	74	Tubulin	0	5	64.3	0	66.6	26.9	64.6	23	51.9	52.1	90.5	41.8
	Z1192266318	10	5.7	99	not assigned	0	16.1	38.5	0	46.4	0	28.1	0	39	20.4	24	0
	Z2440388168	10	6	97	not assigned	0	0.8	30.3	9.7	23.1	22.1	54.5	57.9	0	5.4	44.7	11.1
	Z2711802286	10	7.3	102	not assigned	0	0	50.3	0	47.5	29.8	63.6	53.3	15.8	26.4	47.6	22.5
	Z2271720673	10	7.6	97	not assigned	8.8	0	2.2	0	15.6	0	0	0	24.7	7.4	0	26.8
	Z1934778220	10	5	97	not assigned	0	0	67.3	0	74.2	36.4	64.9	1	34.8	47	69.7	43.1
	Z240245452	10	76.3	51	Tubulin	0	35.7	68.8	0	77.2	25.2	59.7	1	56.9	61.7	85.1	31.6
	Z1987499413	30	18.8	80	not assigned	17.9	3	16.3	17.5	15.1	65.2	29.7	31.7	3.9	11.1	64.3	29.4
	Z4214495965	30	67.9	97	LCH	0	0	83.4	0	81.8	14.4	93.3	32.1	40.5	59.6	78.2	51.7
	Z2826956728	30	52.2	86	LCH	0	0	73.6	0	72.3	40	82.1	53.2	34.7	57.4	73.8	64.5
	Z4874713536	30	22.6	104	MitoStress	26.8	0	0.2	27.3	0	36.7	29.5	82.2	0	5.6	14.5	0
	Z1272424781	30	25.7	90	MitoStress	21.9	0	3	45.8	0	36.7	33.5	88.2	0	12.2	26.9	0
	Z152953646	30	12.8	97	not assigned	0	0	19.9	0	15.8	39.4	40.2	68.1	0	9.1	33	0
	Z2630738954	30	6.4	101	not assigned	12.5	0	18.8	1.8	16	46.2	29.6	57	0	29.1	33.6	29.2
	Z86339633	30	50.3	73	Tubulin	0	0	75.9	0	71.4	26.8	69.1	23	52.9	60	94.6	55.7
	Z240227912	30	17.8	107	not assigned	0	0	50.2	0	57.8	50.9	49.6	33	19.3	42.8	45.2	25.5
	Z1652192371	30	5.2	101	not assigned	44.4	0	0	44.7	0	57	0	40.2	0	0	0	0
	Z443014958	30	43.2	82	not assigned	0	8.2	66.4	0	65.4	19.8	65.7	26.6	32.8	64.4	78.3	47.2
	Z2755057603	30	76	53	Tubulin	0	45.1	60.2	0	68.8	29.4	52.8	7.3	52.3	59.4	83.1	22.3
	Z1173325149	30	7.9	102	not assigned	0.1	0	61.4	0	64.6	44.2	64.7	18.9	33.8	58.6	65.6	66.4
	Z1815872013	30	36.8	88	not assigned	2	0	54.6	0	51.5	33	77.8	63.2	6.2	36.4	65.3	46.4
	Z27666265	30	14.3	95	not assigned	16.8	0	60.7	0	62.9	57.8	56.9	13.2	27.8	65	65.4	71.9
	Z1268663970	30	23	99	LCH	2.5	0	60.9	0	54.4	9	85.1	60.4	14.3	32.3	60	42.9
	Z1002253800	30	70.6	69	Tubulin	0	0	82.1	0	79.3	28.5	81.9	26.3	53.2	59.3	91.8	57.2
	Z1489335802	30	48.9	91	not assigned	0	8.3	63.2	0	63.9	0	77.1	26.3	28	57.4	64.9	25.3
	Z354262560	30	16.6	91	DNA_Synth	75.3	0	0	82.7	0	50.9	0	48.4	0	0	0	0
	Z216478460	30	47	70	Tubulin	0	0	72.7	0	67.5	40	69.2	33.1	40	61.2	91	67.3
	Z195572394	30	37	97	not assigned	0	0	56.6	0	59.3	38.4	75.8	54.2	18.3	34	57.4	29.9
	Z1974526839	30	24.5	94	HDAC	0	0	76.3	0	80	47.4	78	22.8	39.8	60.5	77.7	57.1
	Z1687507311	30	25.7	107	not assigned	0	0	39.1	0	42.5	51.1	48	51.9	0.7	36.8	48.6	23.2
	Z30259505	30	67.9	102	LCH	0	0	76.3	0	74.9	7.9	95.5	39.6	31.1	42.2	69.1	42.3
	Z31167366	30	12.4	98	LCH	0	0	56.2	0	55.5	28.5	83.4	56.8	9.1	26.4	60.4	34.2
	Z2372610665	30	5.5	98	not assigned	0	0	21.8	0	19.3	30.3	44.3	60.8	2.6	10.3	28.1	0
	Z1874197365	30	19	95	not assigned	0	0	46.9	0	42.2	31.3	57.7	59	3.2	29.4	58.2	21.2
	Z1170303504	30	9.5	96	DNA_Synth	50.8	6.1	0	81.7	0	0	0	0	0	0	0	0
	Z961104376	30	12.3	98	not assigned	46.5	0	0	65	0	47.3	7.2	67.9	0	0	0	0
	Z2711802286	30	26.3	98	LCH	0	0	77.2	0	78.2	36.5	81.9	31.8	37.6	52.1	74.6	56.5
	Z441895662	30	18.5	85	not assigned	61.4	0	0	70.2	0	42.7	0	18	0	0	0	6.2
	Z1224510013	30	8.8	105	not assigned	0	0	39.2	0	44.8	44.5	47.3	63.7	12.8	39.5	50.7	17.5
	Z829334752	30	27.8	82	not assigned	39.8	17.4	0	70.6	0	30.6	0	35.6	0	0	0	0
	Z573246462	30	36.1	98	not assigned	0	36.1	34.5	0	39.7	18.6	47.7	60.9	19	28.2	55.8	0
	Z1309539506	30	10.9	81	not assigned	17.3	59.1	0	79.8	0	15.1	0	22.3	0	0	0	0
	Z1698212721	30	18.7	86	not assigned	43.8	0	0	71	0	33.2	4.7	77.7	0	1	0.6	0
	Z872213700	30	37	94	not assigned	59.2	0	0	66.4	0	47.6	17.5	78.8	0	0	0	0
	Z1280184773	30	21.8	82	DNA_Synth	32.6	36	0	86.4	0	16.7	0	28.4	0	0	0	0
	Z1343326967	30	9	86	not assigned	0	0	47.8	0	44.9	5.8	74.7	43.7	12.7	5.3	42	28.5
	Z989391582	30	5.7	85	not assigned	20.5	0	51.3	0	51.4	28.3	66	42.9	16.3	52.3	56.4	63.7
	Z5177345660	30	58	94	Tubulin	0	0	82.4	0	76.6	5.8	75.1	13.7	47.8	68.1	83.1	53.1
	Z2093329687	30	88.8	52	Tubulin	0	0	84.2	0	85.7	19.1	81.8	31.3	55.8	65.5	86.1	48.1
	Z1823930494	30	10.4	93	not assigned	20.2	0	30.9	0	40.5	61.8	53.5	62.6	0	31.3	44.8	38.3
	Z4323477990	30	20.7	84	not assigned	70.3	0	0	74.1	0	41.8	0	19.4	0	0	0	14.5
	Z649071304	30	23.3	92	not assigned	0	0	76.8	0	73.1	37.8	73	16.9	37.3	55.8	74.7	65
	Z102118372	30	7.3	91	not assigned	0	0.6	17	0	20.6	48.3	42.1	64.7	0	16.8	28.2	0
	Z56884058	30	16.9	99	not assigned	0	0	51.5	0	53.1	46.9	65.1	58.5	7.6	40.9	65.6	29.4
	Z1578913905	30	48.7	85	MitoStress	25.3	0	1.6	44.8	0	29.4	30	96.7	0	9	21	0
	Z89423569	30	15.5	85	DNA_Synth	52.8	14.5	0	86.7	0	33.4	0	64.2	0	0	0	0
	Z1579829973	30	5.7	96	not assigned	10.7	0	23.4	0	12.7	23.4	38.8	67.5	0	7.5	32.5	14.6
	Z2375527175	30	14	109	not assigned	0	0	31.3	0	34.2	40.8	46	65	0	36.5	41	17.6
	Z1233966031	30	6.9	103	not assigned	0	0	21.9	0	22.4	45.7	39.3	65.1	0	26.6	34.2	6.4
	Z1232659049	30	18.7	94	not assigned	0	0	62.4	0	56.2	49.2	67	28.1	23	47.4	74.7	56.4
	Z1462086260	30	16.8	99	not assigned	33.6	0	11.7	0	10.2	60.8	18	43.9	0	13.7	24.1	37.5
	Z319100322	30	47.8	102	LCH	0	0	65.5	0	65.5	23.9	93.5	50.3	17.6	32	63.1	41
	Z1743374561	30	11.6	84	not assigned	53.8	0	0	56.3	0	39.4	25.3	52	0	0	26.3	32.6
	Z1134306708	30	6.7	92	not assigned	39.8	0	26.1	1.8	34.2	66	46.6	35.5	0	34	43.4	53.8
	Z1618216379	30	34.9	95	not assigned	0	0	75.6	0	79.3	46.1	72.1	28.2	35	56.3	76	57.3
	Z2959955942	30	12.3	95	not assigned	52.1	0	0	47.9	0	61.6	3.8	43.6	0	0	0	0
	Z1552687391	30	24.7	69	not assigned	4.5	0	43.7	0	45.1	57.8	50.3	25.1	7.5	57.6	59.9	49.7
	Z108938506	30	13.5	86	not assigned	41	0	12.4	47.5	10.9	21.9	31.3	27	0	31.3	41.4	54.3
	EN300-110890	30	5.7	99	not assigned	0	0	53.9	0	58.7	42.1	33	0	40.2	60	60.8	40.6
	Z223843866	30	12.3	99	not assigned	22.6	0	14.9	0	11.2	57.3	34.1	41.4	0	2	34.3	22
	Z1641031568	30	18.3	105	not assigned	0	0	13.3	0	4.7	39.1	28.3	58.7	0	2.6	29.3	0
	Z1894892074	30	10.7	89	not assigned	13.7	0	59.1	0	54.1	37.6	74	39.8	9.1	39	62.1	58.2
	Z2439469901	30	19	87	not assigned	12.6	25.1	0	70.7	0	28.8	0	52.8	0	0	12.4	0
	Z2682987787	30	13	90	not assigned	68.7	0	0	56.1	0	36.2	27.9	47.9	0	9.3	22.3	39.9
	Z203040794	30	11.1	97	not assigned	10.3	22.9	0	59.5	0	19.2	0	57.3	0	0	0	0
	Z127371980	30	5	98	not assigned	41.5	5.5	0	63.1	0	30.5	2.9	17.6	0	6.4	10.6	22.2
	Z2974957447	30	18.7	96	not assigned	0	0	20.3	10.7	15.2	30.8	38.5	76.3	0	29.8	35.8	3.8
	Z2212926414	30	5.2	93	not assigned	20.4	0	0	47.2	0	27.3	25	75.3	0	0	20.8	0
	Z1642247682	30	15.9	90	not assigned	0	2.7	42.6	0	45.6	33.9	55.2	56.4	0	44.1	49.7	23.4
	Z1566227021	30	31.3	77	not assigned	19.9	0	36.5	0	34.8	57.5	48.7	31.8	0	47.9	53.7	53
	Z238766162	30	5.2	97	not assigned	0	0	43.3	0	43.2	27.5	50.7	33.3	13.7	27.8	49.6	11.7
	Z90505968	30	28.5	89	not assigned	0	0	49.2	0	50.3	31.4	67.8	63.6	11.5	33.9	57.7	30.4
	Z238767262	30	76.7	79	Tubulin	0	0	77.4	0	78	44.2	74	27.2	41.7	58.2	81	57.1
	Z1952704289	30	7.8	101	not assigned	45.9	0	0	50.6	0	27.7	40.2	62.9	0	9.2	11.8	7.1
	Z2252066711	30	15.4	88	DNA_Synth	57.9	12.7	0	95.1	0	0	0	31.8	0	0	0	0
	Z1833927862	30	27.5	90	not assigned	0	0	73.8	0	73.8	52.8	76.2	15.7	30.3	59.8	75.6	66
	Z1983676530	30	21.9	102	not assigned	0	0	61.5	0	67.5	50.5	50.2	0	39.8	43.3	66.4	54.4
	Z2091650549	30	15.4	87	not assigned	3.8	0	23.4	0	21.8	50.6	44.2	63.9	0	20.1	41.6	13.3
	Z1095004066	30	5.2	105	not assigned	0	0	74.4	0	73.5	22.2	58.8	26.2	40.3	58.3	73.1	41.4
	Z2370536689	30	23.8	94	not assigned	0	0	49	0	53.3	44.5	56.2	47.7	13.8	42.9	57	50.3
	Z1994555355	30	6	96	not assigned	0	7.9	20.7	5.8	16.8	31.7	26.6	57.1	0	42.3	42.8	12.1
	Z104378286	30	24	100	not assigned	0	18.3	56.3	0	58.6	24.2	33	0	44.2	53.8	67.4	33.8
	Z1795984189	30	30.7	77	Tubulin	3.8	0	58.6	0	48.5	27.5	61	25.4	29.5	48.3	84.9	66.6
	Z1546890795	30	25.6	86	not assigned	0	0	35	0	27.7	28.8	45.1	64.3	19.6	17.9	63.6	9
	Z989410894	30	56.5	85	not assigned	0	0	77.7	0	72.6	42.5	66.7	10.8	39	66.1	77.1	71.3
	Z1667551794	30	18.5	90	DNA_Synth	57.8	4	0	90.8	0	9.7	0	51.4	0	0	0	0
	Z1268664530	30	19.9	101	not assigned	0	0	34.1	2.9	28.8	25.6	58.4	74.6	0.5	17.2	46.6	12.6
	Z3584044187	30	33.3	99	not assigned	0	0	64.8	0	65	30.2	73	41.8	18.7	46.4	65.6	44.9
	Z1530433491	30	10.5	93	not assigned	0	0	65.3	0	63.8	33	72	33	20	56	76.8	50.5
	Z1336472328	30	19.7	98	not assigned	0	0	51.3	0	49.9	44.7	64.2	62.2	7.4	51	61.7	44.4
	Z1139333871	30	10.4	104	not assigned	2.9	0	42.7	19.7	47.1	19.4	65.5	35.6	13.3	34.8	54.7	49.9
	Z94821664	30	7.6	88	not assigned	11	0	4.9	40.3	0	41.2	25	68	0	12.6	39.3	10.5
	Z1530419938	30	11.1	98	not assigned	6.9	0	54	0	59.7	57.2	67.8	53	18.4	47.7	62.4	55.6
	Z1268664185	30	9.7	97	not assigned	19	0	17.9	23	7.3	23.7	47.8	71	0	7.3	28.4	5.9
	Z4262246334	30	5.5	97	not assigned	23.1	0	51.1	0	54.8	28.5	54.3	0	13.5	50.5	46.6	68.8
	Z1874229457	30	35.2	75	not assigned	0.8	0	39.1	0	35.1	38.3	54.3	76.6	9.9	40.4	59.9	34.7
	Z88340009	30	16.8	95	not assigned	0	12.8	51.7	0	56.5	16.2	28	0	41.2	48.3	52.1	33
	Z2073445831	30	5.9	86	not assigned	57.7	0	0	65.7	0	43.1	0	46.8	0	0	2.6	4.4
	Z1973182906	30	9.3	106	not assigned	0	0	28.1	0	27.5	54.2	39.4	45.3	0	32.2	46.9	28.9
	Z966099900	30	33.7	86	Tubulin	0	0	72.6	0	70.7	42	66.8	0	37.7	68.4	81.2	66.1
	Z1268663687	30	5.4	93	not assigned	33.4	0	22.8	47.4	17.6	0	57.7	57.4	3.6	8.5	34.2	28.1
	Z56884254	30	16.2	104	not assigned	17.4	0	38.9	0	38	54.4	55.5	52.7	10.6	28.9	49.8	41.9
	Z2910078736	30	6.9	93	not assigned	0	0	65.7	0	62.9	46	66.1	20.9	29.1	48	69.9	61.4
	Z1642870012	30	40.8	75	MitoStress	49.2	0	0	86.5	0	13.4	7.7	86.8	0	0	0	0
	Z1497354166	30	11.1	105	not assigned	19.3	0	0	13.7	0	47	10.8	63.3	0	0	0.4	0
	Z1548464734	30	28	82	DNA_Synth	59.1	0	0	85.1	0	30.6	0	76	0	0	0	0
	Z2445066501	30	48.5	104	LCH	0	0	70.5	0	69.4	9.8	93.1	38.5	29	39.1	68.5	39.4
	Z1934778220	30	21.1	96	not assigned	0	0	69.2	0	71.3	47	59.1	22.2	31.6	68	75.9	53.3
	Z1458474986	30	36.4	99	LCH	0	0	70.9	0	68.7	19.4	92.1	49.8	27.2	45.9	65.2	44.5
	Z4909999930	30	74.8	68	Tubulin	0	0	80.7	0	81.6	34.2	74.3	12.3	57.3	65.8	92.4	52.2
	Z639464340	30	11.1	98	not assigned	20.8	0	52.4	0	54	33.1	63.4	50.5	13.1	42.7	54.9	50.5
	Z1567827711	30	7.9	91	not assigned	0	0	30.1	0	30.9	40.3	45.1	70.9	3.9	42.1	47.8	20.9
	Z146259236	30	11.6	96	not assigned	0	0	33.8	0	37.1	37.6	53.5	64.5	0	18.2	47	5.1
	Z1192143929	30	6	95	DNA_Synth	44.1	8.8	0	85.2	0	6.7	0	59.1	0	0	0	0
	Z146425436	30	5.5	103	not assigned	70.1	0	0	65	0	48.9	0	46	0	0	0	2.6
	Z2936908305	30	16.2	84	not assigned	0	0	47.2	0	45.5	51.4	63.5	51.9	14.2	35.5	67	44.5
	Z1318707669	30	8.3	96	not assigned	23	0	36.7	10.3	33.4	39.7	59.5	72.7	1.7	37.1	56.2	40.6
	Z1470763353	30	15.9	103	not assigned	0	0	19.1	0	18.3	42.7	43.9	69.2	0	14.3	34.5	0
	Z2460245482	30	15.2	91	not assigned	0	0	63	0	67.7	27.5	64.9	38.9	35	32.3	66.7	26.1
	Z88360701	30	11.1	100	not assigned	6	0	22.7	0	17.4	42.9	40.7	58.4	0	14.7	31.6	3.6
	Z1590666321	30	21.1	98	LCH	0	0	44.8	0	52.8	39.6	80.8	38.2	3.5	23.4	47.8	31.4
	Z1539231813	30	6.9	92	not assigned	45.9	0	17.3	41.9	16.6	41.2	49.4	49.2	0	13.4	51	43.1
	Z1796449560	30	7.6	95	not assigned	2.7	0	54.6	0	60.1	22.8	74	4.2	23.2	35	51.5	59.6
	Z1874210456	30	6.2	95	not assigned	36.9	0	28.4	5	28.3	32.9	53.5	46.1	0	4.1	36.8	39.1
	Z2274348995	30	6.6	98	not assigned	0	0	44.8	0	41.7	13.8	68.5	61.4	13.8	11.3	50.7	15
	Z2440388168	30	47.2	90	LCH	0	0	56.6	0	53.3	27.7	88.6	58.4	1.2	32.1	60.5	41.1
	Z1348251657	30	55.6	91	Tubulin	0	0	64.4	0	53.6	23.5	69.6	39.7	31.9	49.1	88.1	53.7
	Z2033610895	30	10	93	not assigned	0	0	55.5	0	58.1	41.7	72.2	57.1	7.8	43.6	61.2	34.5
	Z1188030578	30	83.8	50	Tubulin	0	13.5	79.6	0	81.9	27.8	71	13.5	56.9	64.7	88.4	43.6
	Z2408231814	30	20.7	100	HDAC	0	0	79.1	0	82	39	73.3	20.3	34.2	57.6	78.7	52.2
	Z1066507488	30	10.4	98	not assigned	32.6	0	31.6	16.7	23.6	32.9	51.9	20.9	0	13.7	53.5	57.8
	Z2010446365	30	15.5	105	not assigned	0	0	76.6	0	76	30.5	76.9	44.4	35.9	69.2	76.2	54.7
	Z2271720673	30	24.9	101	not assigned	24.3	0.6	0	31.4	0	0	0	0	3.6	0	0	8.3
	Z1331297419	30	6.4	93	not assigned	39.1	0	9	46.5	1.9	23.6	53.3	63.9	0	10.9	18.1	18.1
	Z229180068	30	20.9	98	not assigned	0	0	16.2	0	10.9	42.2	41.1	63.4	0	7.6	38.5	0
	Z109632196	30	6	100	not assigned	12.3	0	18.9	0	15.9	62.4	35.3	55.1	0	16.1	38.4	14.3
	Z1272289929	30	31.3	92	not assigned	5.5	0	32.4	29.3	28.2	23	54.9	61.9	0.3	30.8	64.6	30.2
	Z4607589947	30	23.8	89	not assigned	14.5	0	43.6	11.3	33.3	29.3	69.5	50	0	26.6	61.3	47.5
	Z164860426	30	13.1	105	not assigned	0	1	37.9	0	36.2	8.4	60.4	62.7	15.1	21.2	44.5	4.1
	Z1268663650	30	17.3	90	not assigned	11	0	43.8	12.6	40.8	18.2	76.2	61.2	7.9	10.2	52.7	34.1
