# Supplementary material for: Identification of readily available pseudo-natural products
Source: RSC Med Chem. 2024 Jul 4;15(8):2709–17. doi: 10.1039/d4md00310a (PMC11324060; doi:10.1039/d4md00310a)
Supplement: MD-015-D4MD00310A-s003 [file MD-015-D4MD00310A-s003.xlsx]

## Sheet: enamine_pnp_fcc
fcc	count	perc	frag1_smiles	ctype	frag2_smiles
204[cm]1107	30773	1.70323	C1CCNCC1	cm	c1cn[nH]c1
328[cm]718	29170	1.6145	c1ccncc1	cm	C1CNCCN1
288[fe]1265	28352	1.56923	c1ccsc1	fe	O=c1cc[nH]cn1
5[cm]1107	24865	1.37623	C1CCNC1	cm	c1cn[nH]c1
328[cm]1107	22376	1.23847	c1ccncc1	cm	c1cn[nH]c1
204[cm]328	21293	1.17853	C1CCNCC1	cm	c1ccncc1
409[cm]1047	19559	1.08255	C1CC1	cm	c1nc[nH]n1
204[cm]547	18714	1.03578	C1CCNCC1	cm	c1cscn1
5[cm]328	17848	0.987853	C1CCNC1	cm	c1ccncc1
204[cm]1047	17488	0.967927	C1CCNCC1	cm	c1nc[nH]n1
139[cm]718	17323	0.958795	c1cncnc1	cm	C1CNCCN1
288[cm]718	17276	0.956194	c1ccsc1	cm	C1CNCCN1
139[fe]288	16342	0.904499	c1cncnc1	fe	c1ccsc1
204[cm]288	15596	0.863209	C1CCNCC1	cm	c1ccsc1
328[fe]1107	15482	0.856899	c1ccncc1	fe	c1cn[nH]c1
328[cm]1047	15073	0.834262	c1ccncc1	cm	c1nc[nH]n1
139[cm]204	14376	0.795684	c1cncnc1	cm	C1CCNCC1
204[cm]409	13739	0.760427	C1CCNCC1	cm	C1CC1
547[cm]718	13412	0.742329	c1cscn1	cm	C1CNCCN1
409[cm]1107	13387	0.740945	C1CC1	cm	c1cn[nH]c1
5[cm]139	11910	0.659196	C1CCNC1	cm	c1cncnc1
718[cm]1107	11882	0.657646	C1CNCCN1	cm	c1cn[nH]c1
288[cm]547	11416	0.631854	c1ccsc1	cm	c1cscn1
5[cm]409	11118	0.61536	C1CCNC1	cm	C1CC1
5[cm]288	10959	0.60656	C1CCNC1	cm	c1ccsc1
139[fe]1047	10832	0.599531	c1cncnc1	fe	c1nc[nH]n1
5[cm]1047	10686	0.59145	C1CCNC1	cm	c1nc[nH]n1
328[fe]1047	10434	0.577502	c1ccncc1	fe	c1nc[nH]n1
288[cm]1047	10356	0.573185	c1ccsc1	cm	c1nc[nH]n1
144[fe]328	9558	0.529017	c1c[nH]cn1	fe	c1ccncc1
112[cm]547	9119	0.504719	c1ccoc1	cm	c1cscn1
556[cm]1107	9110	0.504221	C1CCOC1	cm	c1cn[nH]c1
112[cm]1047	8934	0.49448	c1ccoc1	cm	c1nc[nH]n1
328[cm]409	8877	0.491325	c1ccncc1	cm	C1CC1
139[fe]1107	8652	0.478872	c1cncnc1	fe	c1cn[nH]c1
409[cm]718	8545	0.472949	C1CC1	cm	C1CNCCN1
79[cm]1107	8244	0.45629	C1COCCN1	cm	c1cn[nH]c1
288[cm]328	7957	0.440405	c1ccsc1	cm	c1ccncc1
101[cm]1107	7584	0.41976	C1CCCC1	cm	c1cn[nH]c1
144[cm]204	7516	0.415996	c1c[nH]cn1	cm	C1CCNCC1
112[cm]718	7494	0.414779	c1ccoc1	cm	C1CNCCN1
328[fe]1265	7491	0.414613	c1ccncc1	fe	O=c1cc[nH]cn1
338[fs]676	7136	0.394964	C1CCCCC1	fs	O=C1NCCN1
431[cm]718	6958	0.385112	c1cnoc1	cm	C1CNCCN1
79[cm]288	6867	0.380075	C1COCCN1	cm	c1ccsc1
288[fe]818	6859	0.379633	c1ccsc1	fe	N=c1cc[nH]cn1
718[cm]1047	6842	0.378692	C1CNCCN1	cm	c1nc[nH]n1
409[cm]547	6793	0.37598	C1CC1	cm	c1cscn1
79[cm]1047	6744	0.373268	C1COCCN1	cm	c1nc[nH]n1
204[cm]718	6608	0.36574	C1CCNCC1	cm	C1CNCCN1
547[cm]1107	6552	0.362641	c1cscn1	cm	c1cn[nH]c1
288[cm]409	6498	0.359652	c1ccsc1	cm	C1CC1
79[cm]328	6363	0.35218	C1COCCN1	cm	c1ccncc1
101[fb]338	6347	0.351294	C1CCCC1	fb	C1CCCCC1
204[cm]465	6260	0.346479	C1CCNCC1	cm	c1ccnnc1
288[cm]1107	6245	0.345649	c1ccsc1	cm	c1cn[nH]c1
79[cm]547	6197	0.342992	C1COCCN1	cm	c1cscn1
204[cm]431	6075	0.33624	C1CCNCC1	cm	c1cnoc1
122[cm]1107	6003	0.332255	C1CCOCC1	cm	c1cn[nH]c1
204[cm]797	5785	0.320189	C1CCNCC1	cm	c1cocn1
5[cm]431	5763	0.318971	C1CCNC1	cm	c1cnoc1
144[cm]718	5749	0.318196	c1c[nH]cn1	cm	C1CNCCN1
5[cm]547	5717	0.316425	C1CCNC1	cm	c1cscn1
5[cm]204	5602	0.31006	C1CCNC1	cm	C1CCNCC1
178[cm]204	5511	0.305023	c1ccc2[nH]cnc2c1	cm	C1CCNCC1
79[cm]1416	5469	0.302699	C1COCCN1	cm	c1ccc(CNc2ccccc2)cc1
547[fe]1265	5351	0.296168	c1cscn1	fe	O=c1cc[nH]cn1
328[fe]431	5315	0.294175	c1ccncc1	fe	c1cnoc1
144[fe]547	5255	0.290854	c1c[nH]cn1	fe	c1cscn1
5[cm]144	5229	0.289415	C1CCNC1	cm	c1c[nH]cn1
328[cm]547	5221	0.288972	c1ccncc1	cm	c1cscn1
112[cm]204	5153	0.285209	c1ccoc1	cm	C1CCNCC1
5[cm]718	5134	0.284157	C1CCNC1	cm	C1CNCCN1
79[cm]204	4837	0.267719	C1COCCN1	cm	C1CCNCC1
718[cm]1265	4798	0.26556	C1CNCCN1	cm	O=c1cc[nH]cn1
547[cm]1047	4677	0.258863	c1cscn1	cm	c1nc[nH]n1
1107[cm]1538	4644	0.257037	c1cn[nH]c1	cm	C1CCC1
79[cm]139	4471	0.247461	C1COCCN1	cm	c1cncnc1
338[cm]1107	4400	0.243532	C1CCCCC1	cm	c1cn[nH]c1
409[cm]965	4381	0.24248	C1CC1	cm	c1nnn[nH]1
5[cm]178	4369	0.241816	C1CCNC1	cm	c1ccc2[nH]cnc2c1
409[cm]431	4354	0.240986	C1CC1	cm	c1cnoc1
116[cm]409	4313	0.238716	c1cc[nH]c1	cm	C1CC1
139[cm]409	4289	0.237388	c1cncnc1	cm	C1CC1
204[cm]1416	4288	0.237333	C1CCNCC1	cm	c1ccc(CNc2ccccc2)cc1
5[cm]465	4239	0.234621	C1CCNC1	cm	c1ccnnc1
116[cm]718	4232	0.234233	c1cc[nH]c1	cm	C1CNCCN1
465[cm]718	4201	0.232517	c1ccnnc1	cm	C1CNCCN1
338[cm]1047	4150	0.229695	C1CCCCC1	cm	c1nc[nH]n1
28[cm]204	4061	0.224769	c1ccc(-n2cccn2)cc1	cm	C1CCNCC1
139[cm]328	4035	0.22333	c1cncnc1	cm	c1ccncc1
465[fe]1047	4032	0.223164	c1ccnnc1	fe	c1nc[nH]n1
113[cm]204	3965	0.219455	N=c1cccc[nH]1	cm	C1CCNCC1
1107[cm]1107	3919	0.216909	c1cn[nH]c1	cm	c1cn[nH]c1
1107[fe]1265	3841	0.212592	c1cn[nH]c1	fe	O=c1cc[nH]cn1
144[cm]328	3739	0.206947	c1c[nH]cn1	cm	c1ccncc1
20[cm]718	3716	0.205674	c1cnccn1	cm	C1CNCCN1
288[cm]797	3695	0.204511	c1ccsc1	cm	c1cocn1
328[cm]1538	3657	0.202408	c1ccncc1	cm	C1CCC1
2[cm]718	3644	0.201688	c1ccc2ncccc2c1	cm	C1CNCCN1
